# Supplementary material
Source: Royal Society of Chemistry journal article supplement (doi:10.1039/d6tc00283h)
Supplement: d6tc00283h1.pdf [file d6tc00283h1.pdf]

## Supporting Information for

# A Molecular Strategy for Raman Enhancement

Ying-Fan Tan<sup>1</sup>†, Yangbo Zhang<sup>1</sup>†, Xiong Wang<sup>2</sup>, Ning Zhou<sup>1</sup>, Qingyun Wan<sup>1</sup>\*

<sup>1</sup>Department of Chemistry, The Chinese University of Hong Kong, Hong Kong, China.

<sup>2</sup>Department of Physics, The University of Hong Kong, Pokfulam Road, Hong Kong, China.

\*Corresponding author: [qingyunwan@cuhk.edu.hk](mailto:qingyunwan@cuhk.edu.hk)

†These authors contributed equally to this work.

## Table of Content

|                                                  |    |
|--------------------------------------------------|----|
| 1. Experimental Section .....                    | 2  |
| 2. Raman Spectra .....                           | 6  |
| 3. EF (Enhanced Factor).....                     | 17 |
| 4. Reflectance Spectra.....                      | 20 |
| 5. UV-vis Spectra .....                          | 20 |
| 6. <sup>1</sup> H-NMR Spectra .....              | 20 |
| 7. Refinement Data of the X-ray Structures ..... | 25 |
| 8. IV Curves and Conductivities of M-1/2.....    | 29 |
| 9. Computational details.....                    | 30 |
| References .....                                 | 32 |

## 1. Experimental Section

Raman spectroscopy was performed using an XploRA Plus Raman/PL spectrometer (Horiba Scientific) with the following parameters (unless otherwise specified): excitation wavelength = 532 nm, laser power = 18  $\mu$ W, 100  $\times$  objective, slit width = 50  $\mu$ m, pinhole = 100  $\mu$ m, exposure time = 10 s and laser spot area = 44.2  $\mu$ m<sup>2</sup>. Raman mapping was performed using an inVia™ confocal Raman microscope (Renishaw) with the following parameters: excitation wavelength = 532 nm, laser power = 5  $\mu$ W, 100  $\times$  objective, exposure time = 0.1 s. <sup>1</sup>H-NMR spectra were acquired on a Bruker AVANCE III HD 500 NMR spectrometer. UV-vis spectra of solution-state sample was conducted using a Shimadzu UV3600 Plus UV/VIS/NIR spectrophotometer. Single-crystal X-ray diffraction data were collected on a Bruker D8 Venture X-Ray diffractometer. Current-voltage (I-V) characteristics were measured using a KEITHLEY 4200-SCS semiconductor parameter analyzer. Reflectance spectra were recorded with a home-made measurement system, where the output incident light is filtered by an optical bandpass filter, and the filtered light is relatively pure of specific wavelength, which is reflected into the confocal microscopic system by a beam splitter as the incident light. Newton EM CCD from ANDOR company is used to record the spectrum and the image.

The following materials were used as received:

Tetrabutylammonium bis(1,3-dithiole-2-thione-4,5-dithiolato)nickel(III) and bis(tetrabutylammonium) bis(1,3-dithiole-2-thione-4,5-dithiolato)palladium(II) (TCI) Bis(tetrabutylammonium) bis(1,3-dithiole-2-thione-4,5-dithiolato)zinc, rhodamine 6G, and rhodamine 19 perchlorate (Macklin). Dimethyl malonate (Energy Chemical). Silver conductive paint (Electrolube).

Solvents: Acetonitrile (ACS grade), methanol (ACS grade), ethanol (ACS grade), diethyl ether (2000 ppm water, stabilized with BHT, ACS grade), and dichloromethane (HPLC grade) (RCI Labscan, Thailand). \*n\*-Hexane (95%, ACS grade, Duksan, Korea). DMSO-*d*<sub>6</sub> (J&K Scientific). PBS buffer PH 7.4 (Servicebio). Deionized water was obtained

using a Thermo Scientific Smart2Pure 6 UV purification system.

Raman Spectroscopy Measurement shown in **Figure 3-4**: A stock acetonitrile solution of **R19/R6G** and  $[M(dmit)_2]^{0-}$  complex was mixed in a 1:1 volume ratio to achieve the desired concentration. A 5  $\mu$ L aliquot of the mixed solution was drop-cast onto a silicon wafer and allowed to dry under ambient conditions until complete solvent evaporation. Raman spectra were acquired from approximately 20 different sites per sample.

$^1$ H-NMR Spectroscopy shown in **Figure 5**: **M-1/2** crystals or **R19/R6G** powder were dissolved in DMSO- $d_6$  at a concentration of  $7.2 \times 10^{-3}$  M for NMR analysis.

Raman Spectroscopy Measurement shown in **Figure 6**: **R6G** was dissolved in PBS buffer and **[Ni]** was dissolved in acetonitrile. Two kinds of solution were mixed in a 95:5 volume ratio to achieve the desired concentration. A 5  $\mu$ L aliquot of the mixed solution was drop-cast onto a silicon wafer and allowed to dry under ambient conditions until complete solvent evaporation. Raman spectra were acquired from 20 different sites.

Electrical Transport Measurements: Two-probe DC conductivity measurements were performed on **M-1/2** single crystals. Due to their high intrinsic resistance, contact resistance was assumed negligible. Electrical contacts were established using gold wires (20  $\mu$ m diameter) adhered with silver conductive paint or carbon paste.

**Ni-1**: A solution of tetrabutylammonium bis(1,3-dithiole-2-thione-4,5-dithiolato)nickel(III) (3.5 mg) in acetonitrile (3 mL) was mixed with a solution of rhodamine 19 perchlorate (26 mg) in ethanol (6 mL). The mixture was stored in the dark under static conditions. After one-week, elongated needle-like green crystals formed (1.2 mg, yield: 28%), suitable for spectroscopic and crystallographic analysis.

$^1$ H-NMR (500 MHz, DMSO- $d_6$ )  $\delta$  8.13 (br, 1H), 7.83 (br, 1H), 7.77 (br, 1H), 7.36 (br, 1H), 6.66 (s, 2H), 6.59 (s, 2H), 3.46

– 3.39 (m, 4H), 2.07 (s, 6H), 1.25 (br, 6H).

**Pd-1:** A solution of bis(1,3-dithiole-2-thione-4,5-dithiolato)palladium(II) (9.9 mg) in acetonitrile (3 mL) was mixed with a solution of rhodamine 19 perchlorate (10.4 mg) in ethanol (3 mL). The mixture was stored in the dark under static conditions, yielding elongated needle-like green crystals after four days (5.2 mg, yield: 39%).

<sup>1</sup>H-NMR (500 MHz, DMSO-*d*<sub>6</sub>) δ 13.01 (s, 1H), 8.21 (d, *J* = 8.2 Hz, 1H), 7.85 (t, *J* = 7.5 Hz, 1H), 7.79 (t, *J* = 7.6 Hz, 1H), 7.60 (br, 2H), 7.40 (d, *J* = 7.8 Hz, 1H), 6.88 (s, 2H), 6.76 (s, 2H), 3.49 – 3.44 (m, 4H), 2.08 (s, 6H), 1.25 (t, *J* = 7.1 Hz, 6H).

**Zn-1:** A solution of bis(tetrabutylammonium) bis(1,3-dithiole-2-thione-4,5-dithiolato)zinc (3 mg) in methanol (2 mL) was mixed with a solution of rhodamine 19 perchlorate (3.3 mg) in methanol (2 mL). Slow evaporation at 2 °C in the dark afforded large cubic green crystals after four days (0.8 mg, yield: 35%).

<sup>1</sup>H-NMR (500 MHz, DMSO-*d*<sub>6</sub>) δ 13.02 (s, 1H), 8.20 (br, 1H), 7.85 (t, *J* = 7.6 Hz, 1H), 7.79 (t, *J* = 7.5 Hz, 1H), 7.65 (br, 2H), 7.40 (d, *J* = 5.8 Hz, 1H), 6.87 (s, 2H), 6.76 (s, 2H), 3.45 (br, 4H), 3.18 – 3.14 (m, 8H), 2.07 (s, 6H), 1.57 (p, *J* = 8.0 Hz, 8H), 1.35 – 1.28 (m, 8H), 1.25 (t, *J* = 7.1 Hz, 6H), 0.93 (t, *J* = 7.3 Hz, 12H).

**Ni-2:** A solution of tetrabutylammonium bis(1,3-dithiole-2-thione-4,5-dithiolato)nickel(III) (3 mg) in acetonitrile (3 mL) was mixed with a solution of rhodamine 6G (2.1 mg) in acetonitrile (2 mL). The mixture was stored in the dark under static conditions, yielding elongated needle-like green crystals within one day (1.3 mg, yield: 34%).

<sup>1</sup>H-NMR (500 MHz, DMSO-*d*<sub>6</sub>) δ 8.23 (d, *J* = 7.3 Hz, 1H), 7.93 (br, 1H), 7.86 (br, 1H), 7.60 (br, 3H), 6.86 (s, 2H), 6.79 (s, 2H), 3.94 (br, 2H), 3.59 (br, 4H), 2.19 (s, 6H), 1.29 (br, 6H), 0.84 (t, *J* = 6.5 Hz, 3H).

**Pd-2:** A solution of bis(tetrabutylammonium) bis(1,3-dithiole-2-thione-4,5-dithiolato)palladium(II) (5 mg) in acetonitrile (3 mL) was mixed with a solution of rhodamine 6G (4.9 mg) in acetonitrile (2 mL). The mixture was stored in the dark under static conditions, yielding elongated plate-like green crystals within one day (3.2 mg, yield: 45%).

$^1\text{H-NMR}$  (500 MHz,  $\text{DMSO-}d_6$ )  $\delta$  8.24 (d,  $J = 7.8$  Hz, 1H), 7.90 (t,  $J = 7.4$  Hz, 1H), 7.83 (t,  $J = 7.7$  Hz, 1H), 7.70 (t,  $J = 6.0$  Hz, 2H), 7.47 (d,  $J = 7.5$  Hz, 1H), 6.94 (s, 2H), 6.80 (s, 2H), 3.94 (q,  $J = 7.1$  Hz, 2H), 3.49 (p,  $J = 7.2$  Hz, 4H), 2.09 (s, 6H), 1.26 (t,  $J = 7.1$  Hz, 6H), 0.84 (t,  $J = 7.1$  Hz, 3H).

**Zn-2:** A solution of bis(tetrabutylammonium) bis(1,3-dithiole-2-thione-4,5-dithiolato)zinc (5 mg) in acetonitrile (1 mL) was layered with a solution of rhodamine 6G (5.1 mg) in acetonitrile/water (1:1 v/v, 2 mL). Slow evaporation at 2 °C yielded elongated green crystals within one day (4.2 mg, yield: 69%).

$^1\text{H-NMR}$  (500 MHz,  $\text{DMSO-}d_6$ )  $\delta$  8.24 (d,  $J = 7.9$  Hz, 1H), 7.90 (t,  $J = 7.5$  Hz, 1H), 7.83 (t,  $J = 7.7$  Hz, 1H), 7.70 (br, 2H), 7.47 (d,  $J = 7.6$  Hz, 1H), 6.94 (s, 2H), 6.80 (s, 2H), 3.94 (q,  $J = 7.2$  Hz, 2H), 3.51 – 3.47 (m, 4H), 3.19 – 3.13 (m, 8H), 2.09 (s, 6H), 1.57 (p,  $J = 7.9$  Hz, 8H), 1.35 – 1.28 (m, 8H), 1.26 (t,  $J = 7.2$  Hz, 6H), 0.93 (t,  $J = 7.3$  Hz, 12H), 0.84 (t,  $J = 7.1$  Hz, 3H).

**Ni:** A solution of tetrabutylammonium bis(1,3-dithiole-2-thione-4,5-dithiolato)nickel(III) (4 mg) in acetonitrile (2 mL) was subjected to vapor diffusion of diethyl ether, yielding elongated green crystals (1.7 mg, yield: 43%).

**Pd:** Commercially obtained bis(tetrabutylammonium) bis(1,3-dithiole-2-thione-4,5-dithiolato)palladium(II) (purple needle-like crystals) was used directly for Raman spectroscopy.

**Zn:** A solution of bis(1,3-dithiole-2-thione-4,5-dithiolato)zinc (5 mg) in dichloromethane (1 mL) was layered with hexane (1 mL). After 12 h, red plate crystals formed (2.6 mg, yield: 52%).

**1:** A solution of rhodamine 19 perchlorate (2 mg) in acetonitrile (0.7 mL) was subjected to vapor diffusion of diethyl ether, yielding red crystals after 12 h (0.7 mg, yield: 35%).

$^1\text{H-NMR}$  (500 MHz,  $\text{DMSO-}d_6$ )  $\delta$  13.03 (s, 1H), 8.23 (d,  $J = 7.9$  Hz, 1H), 7.86 (t,  $J = 7.5$  Hz, 1H), 7.80 (t,  $J = 7.6$  Hz, 1H), 7.68 (br, 2H), 7.42 (d,  $J = 7.5$  Hz, 1H), 6.92 (s, 2H), 6.80 (s, 2H), 3.48 (p,  $J = 7.1$  Hz, 4H), 2.09 (s, 6H), 1.26 (t,  $J = 7.2$  Hz, 6H).

**2:** A solution of rhodamine 6G (7 mg) in dichloromethane (2 mL) was layered with hexane (1 mL). After several days, red plate crystals formed (4 mg, yield: 57%).

$^1\text{H-NMR}$  (500 MHz,  $\text{DMSO-}d_6$ )  $\delta$  8.24 (d,  $J = 7.8$  Hz, 1H), 7.90 (t,  $J = 7.6$  Hz, 1H), 7.83 (t,  $J = 7.6$  Hz, 1H), 7.75 (t,  $J = 6.0$  Hz, 2H), 7.47 (d,  $J = 7.6$  Hz, 1H), 6.94 (s, 2H), 6.80 (s, 2H), 3.94 (q,  $J = 7.0$  Hz, 2H), 3.49 (p,  $J = 7.2$  Hz, 4H), 2.10 (s, 6H), 1.26 (t,  $J = 7.2$  Hz, 6H), 0.84 (t,  $J = 7.1$  Hz, 3H).

All the crystals powder were collected by filtration, washed with diethyl ether and dried in vacuum.

## 2. Raman Spectra

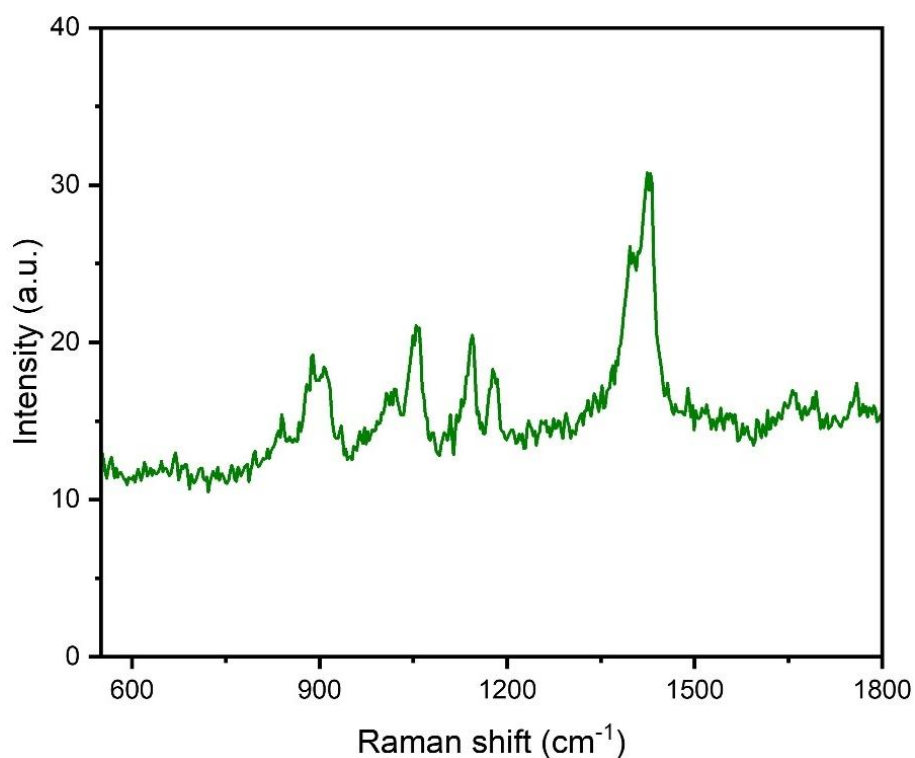

**Figure S1.** Raman spectrum of the **[Ni]** single crystal ( $\lambda_{\text{ex}} = 532$  nm).

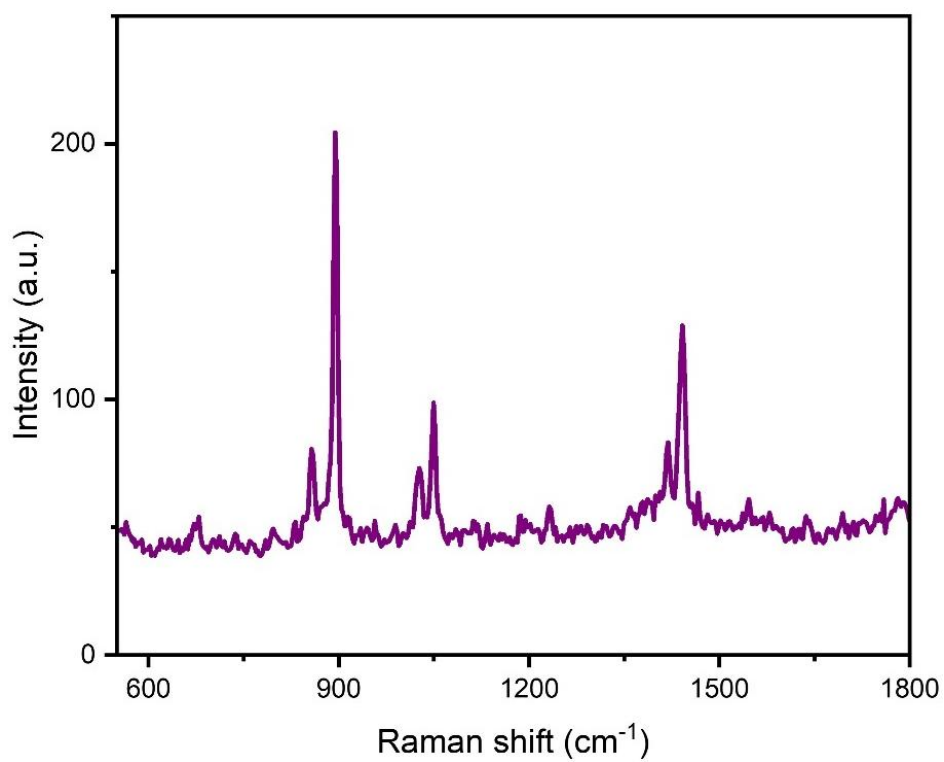

**Figure S2.** Raman spectrum of the [Pd] single crystal ( $\lambda_{\text{ex}} = 532 \text{ nm}$ ).

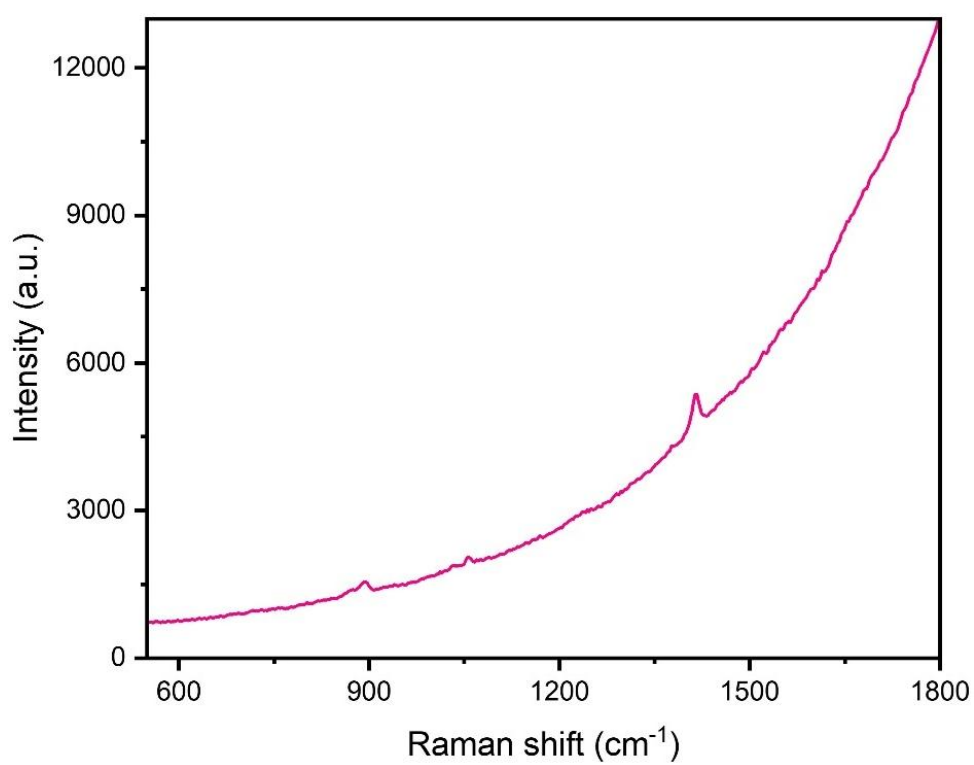

**Figure S3.** Raman spectrum of the [Zn] single crystal ( $\lambda_{\text{ex}} = 532 \text{ nm}$ ).

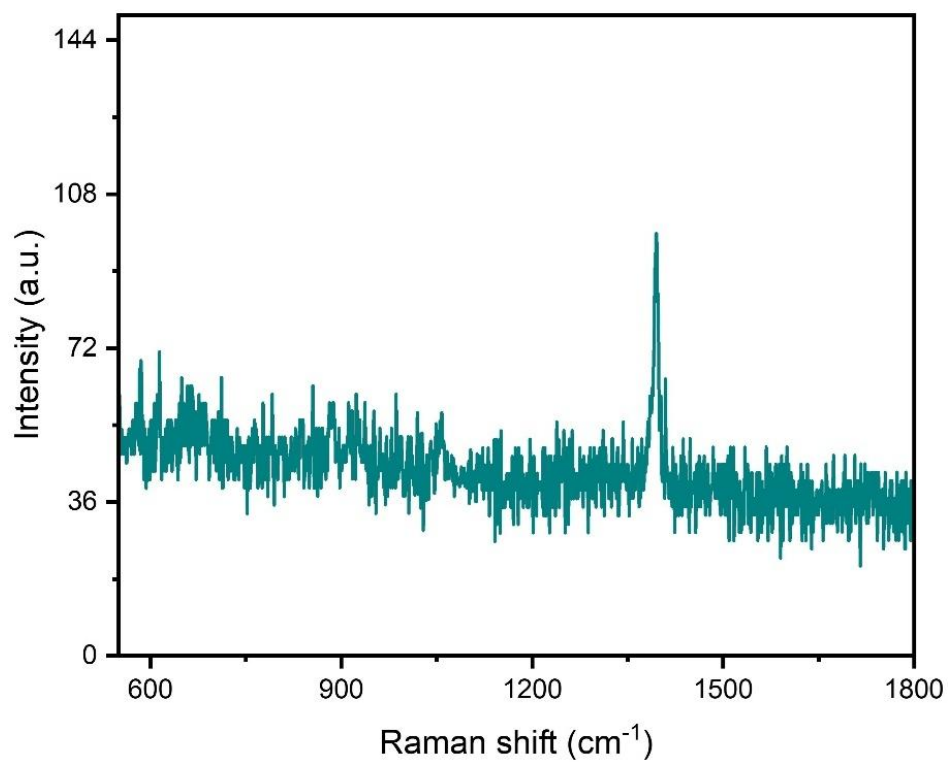

**Figure S4.** Raman spectrum of Ni-2 single crystal with 785 nm excitation wavelength.

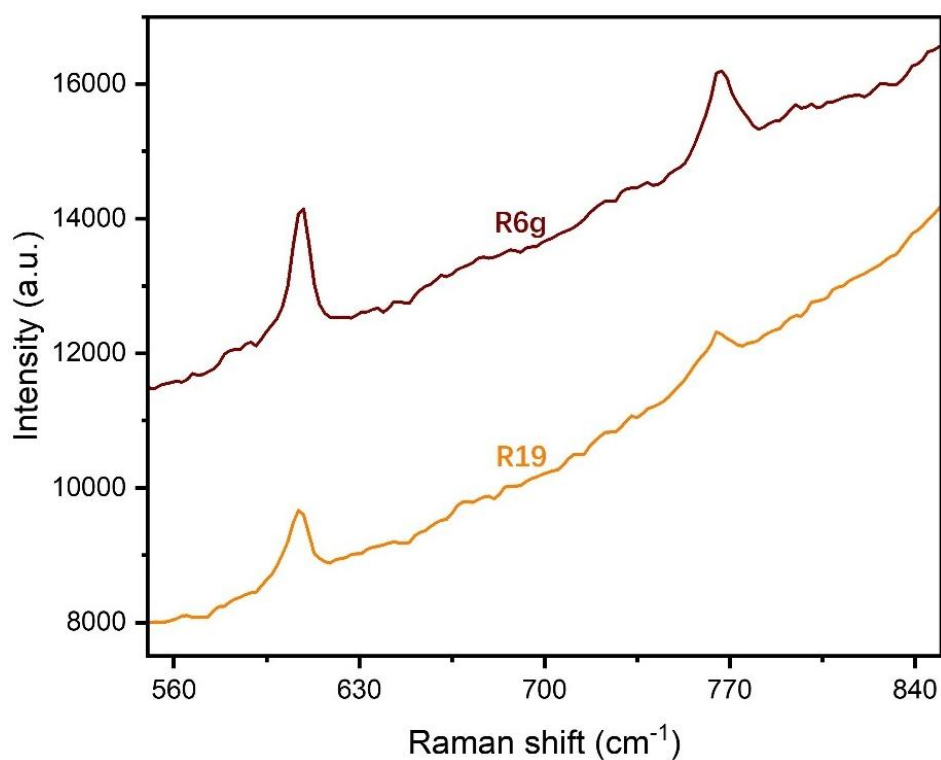

**Figure S5.** Averaged Raman spectrum of R6G and R19 dried from their respective solution with concentration =  $1 \times 10^{-3}$

Raw data of **R19/R6G+M** at specific concentrations

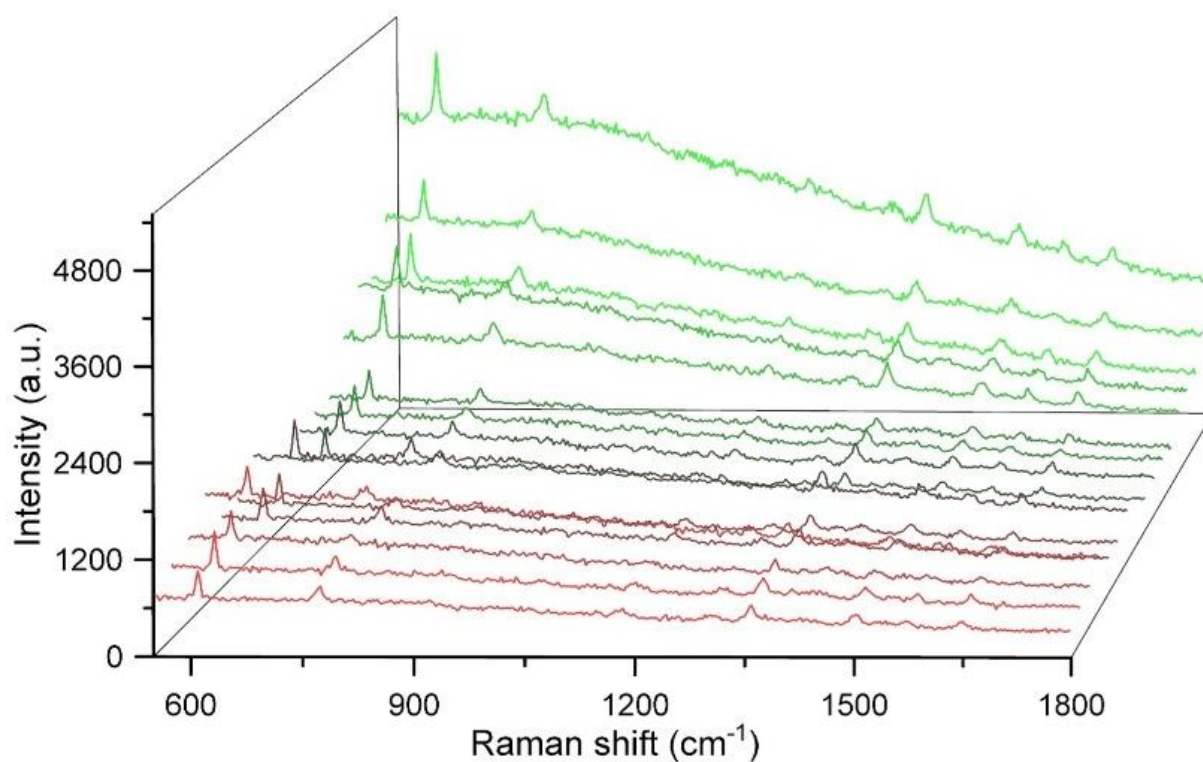

**Figure S6.** Raman spectra of mixed solution dried on the Si substrate: **[R19]** =  $1 \times 10^{-6}$  M & **[Ni]** =  $5 \times 10^{-5}$  M ( $\lambda_{\text{ex}}$  = 532 nm).

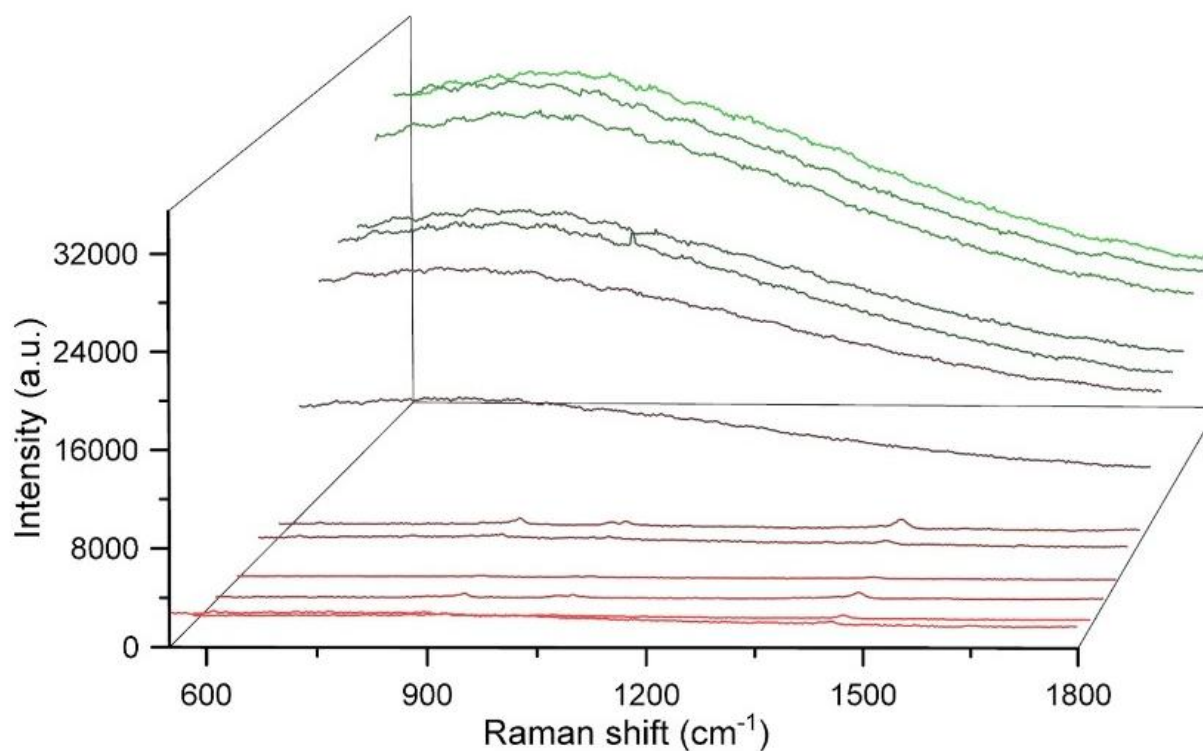

**Figure S7.** Raman spectra of mixed solution dried on the Si substrate: **[R19]** =  $1 \times 10^{-6}$  M & **[Pd]** =  $5 \times 10^{-5}$  M ( $\lambda_{\text{ex}}$  = 532 nm).

nm).

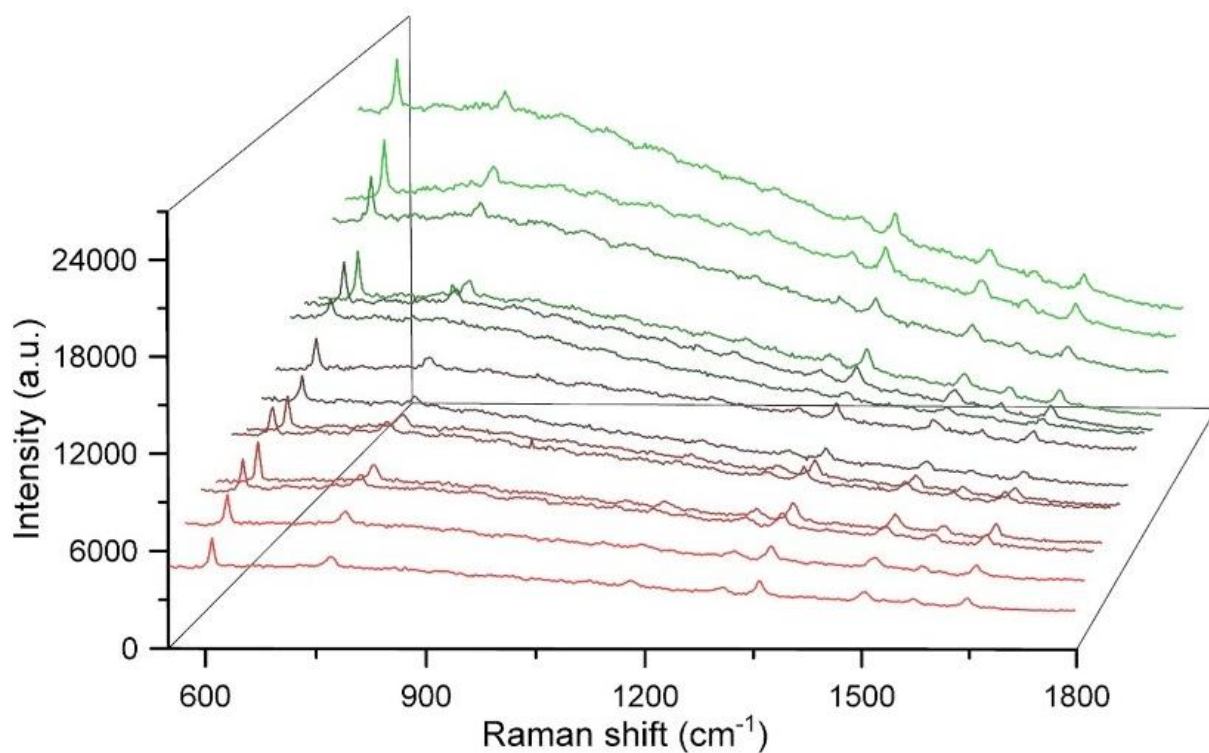

**Figure S8.** Raman spectra of mixed solution dried on the Si substrate:  $[R19] = 1 \times 10^{-6} \text{ M}$  &  $[Ni] = 1 \times 10^{-5} \text{ M}$  ( $\lambda_{\text{ex}} = 532 \text{ nm}$ ).

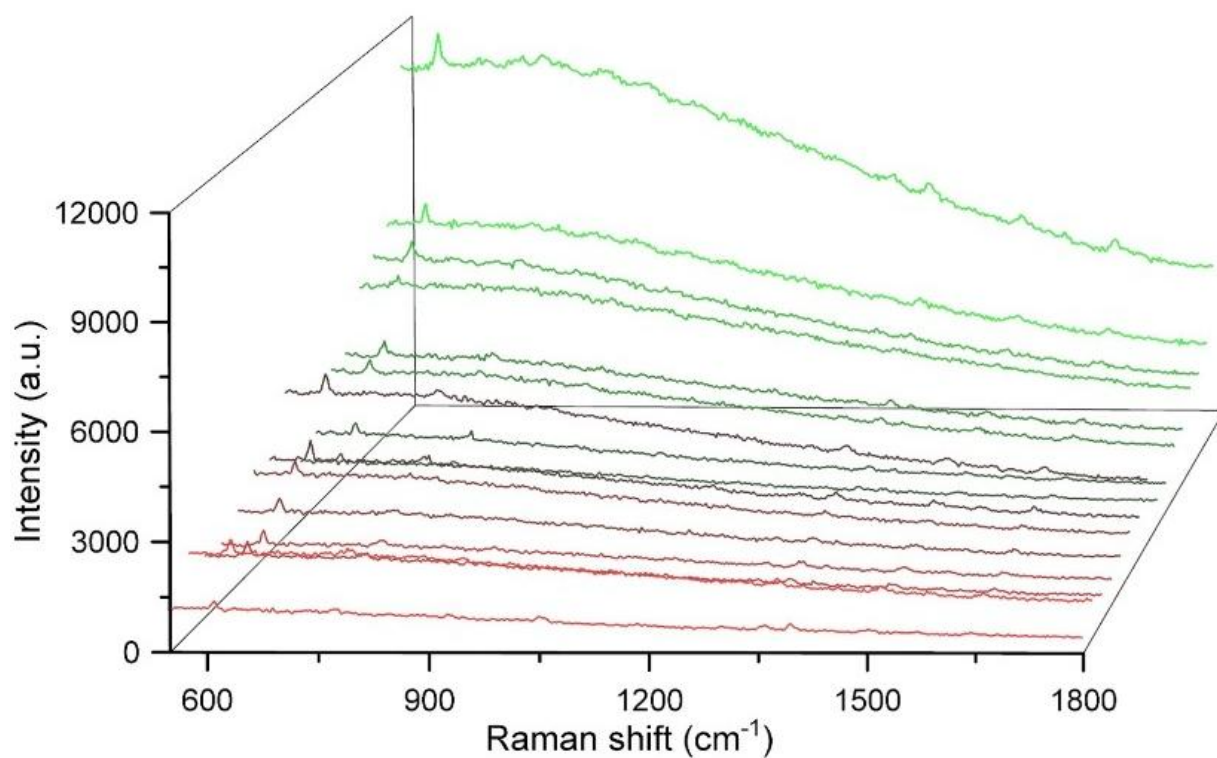

**Figure S9.** Raman spectra of mixed solution dried on the Si substrate:  $[R19] = 1 \times 10^{-6} \text{ M}$  &  $[Ni] = 1 \times 10^{-4} \text{ M}$  ( $\lambda_{\text{ex}} = 532 \text{ nm}$ ).

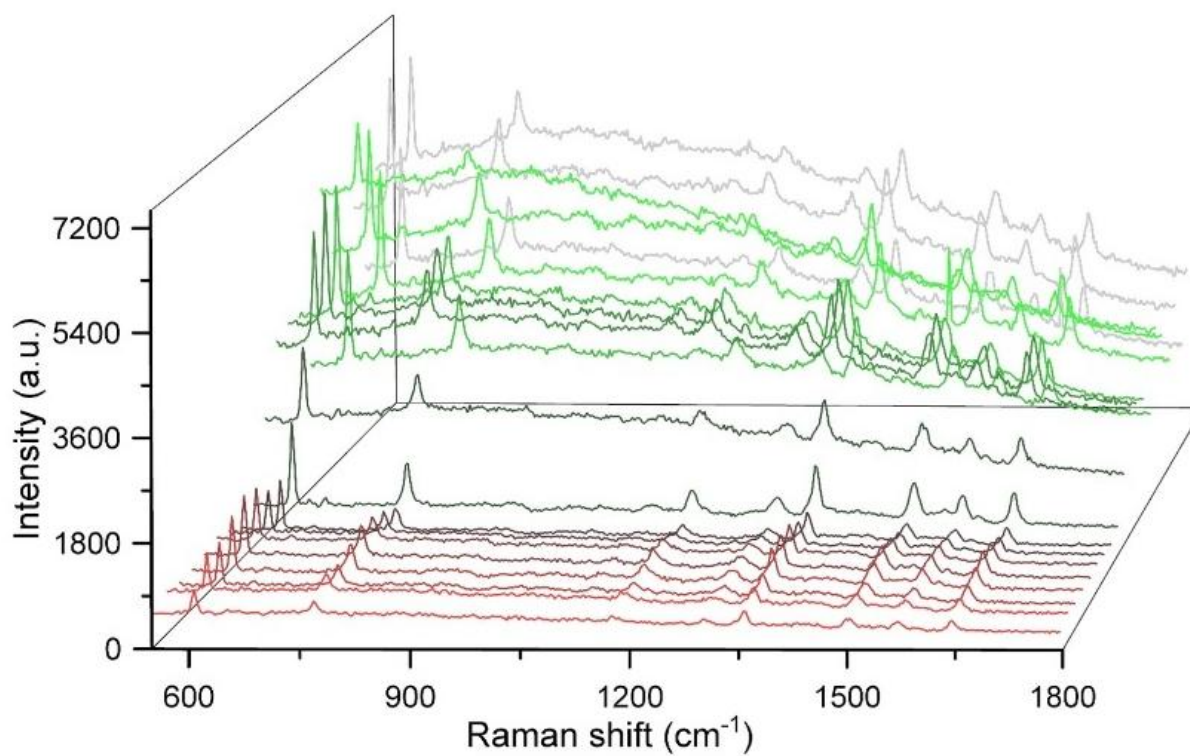

**Figure S10.** Raman spectra of mixed solution dried on the Si substrate:  $[R6G] = 1 \times 10^{-6} \text{ M}$  &  $[Ni] = 5 \times 10^{-5} \text{ M}$  ( $\lambda_{\text{ex}} = 532$  nm).

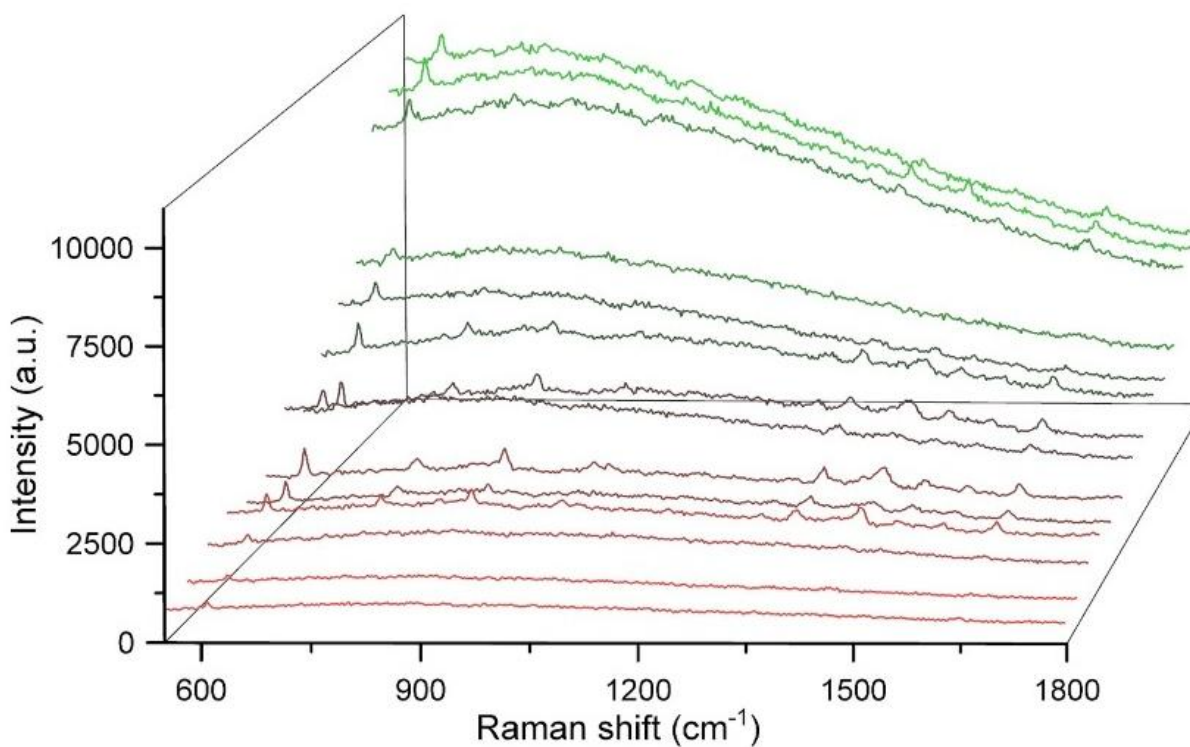

**Figure S11.** Raman spectra of mixed solution dried on the Si substrate:  $[R6G] = 1 \times 10^{-6} \text{ M}$  &  $[Pd] = 5 \times 10^{-5} \text{ M}$  ( $\lambda_{\text{ex}} = 532$  nm).

nm).

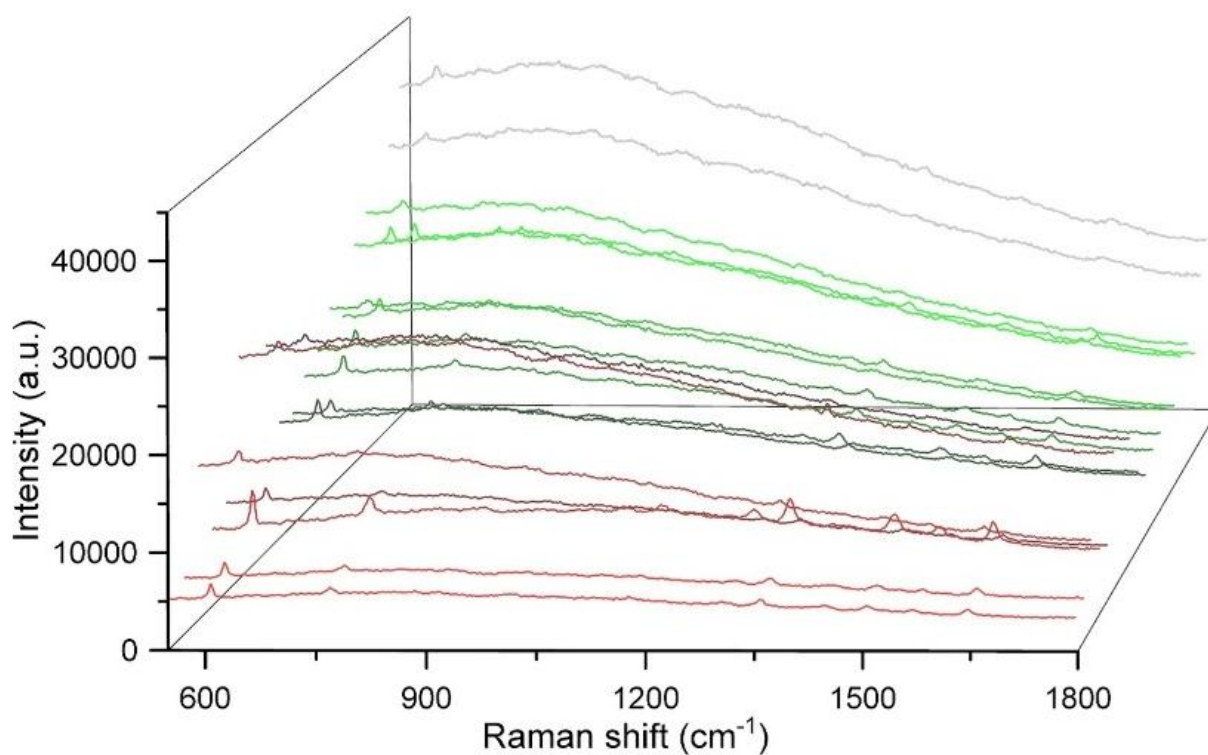

**Figure S12.** Raman spectra of mixed solution dried on the Si substrate: [R6G] =  $1 \times 10^{-6}$  M & [Ni] =  $1 \times 10^{-5}$  M ( $\lambda_{\text{ex}}$  = 532

nm).

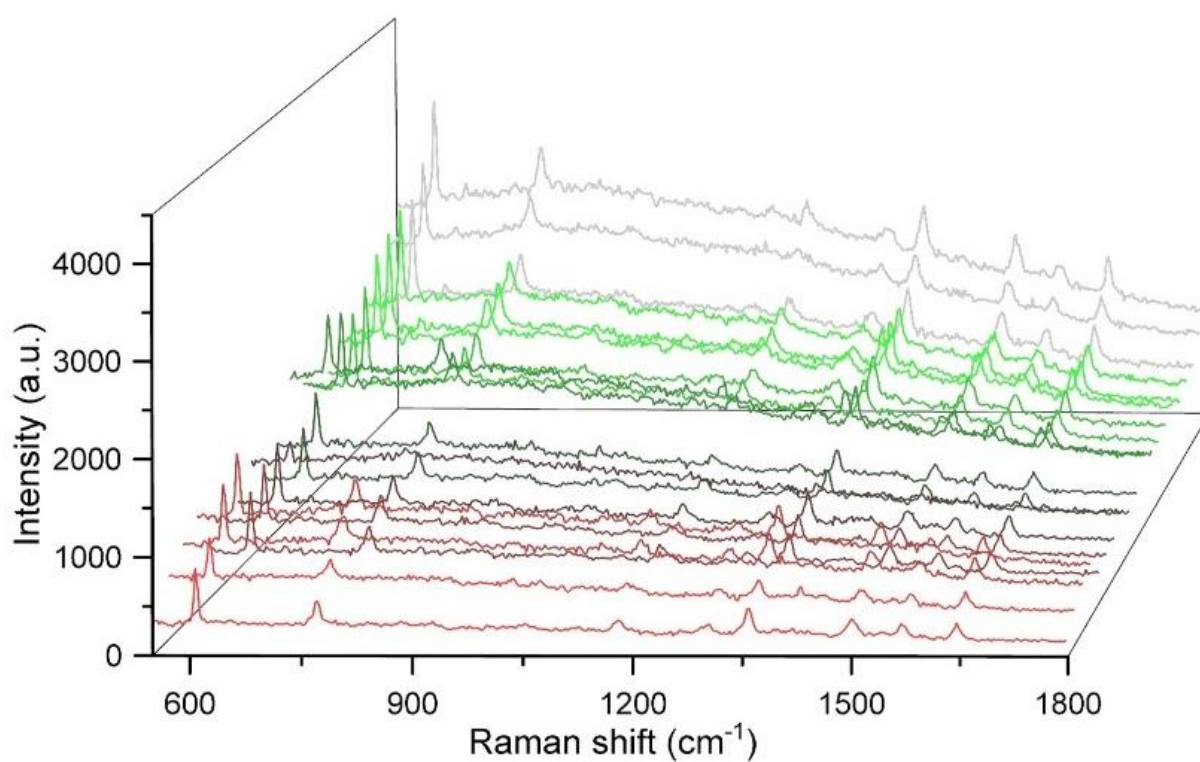

**Figure S13.** Raman spectra of mixed solution dried on the Si substrate:  $[R6G] = 1 \times 10^{-6} \text{ M}$  &  $[Ni] = 1 \times 10^{-4} \text{ M}$  ( $\lambda_{\text{ex}} = 532$  nm).

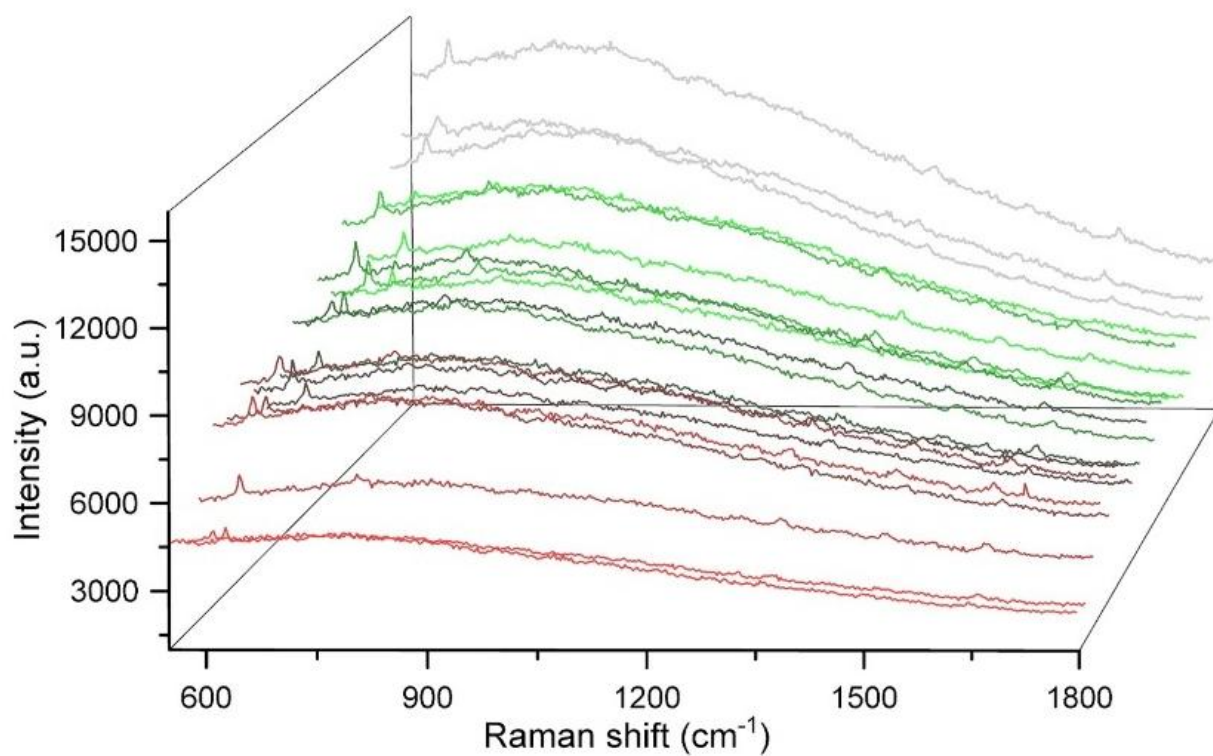

**Figure S14.** Raman spectra of mixed solution dried on the Si substrate:  $[R6G] = 1 \times 10^{-7} \text{ M}$  &  $[Ni] = 1 \times 10^{-5} \text{ M}$  ( $\lambda_{\text{ex}} = 532$  nm).

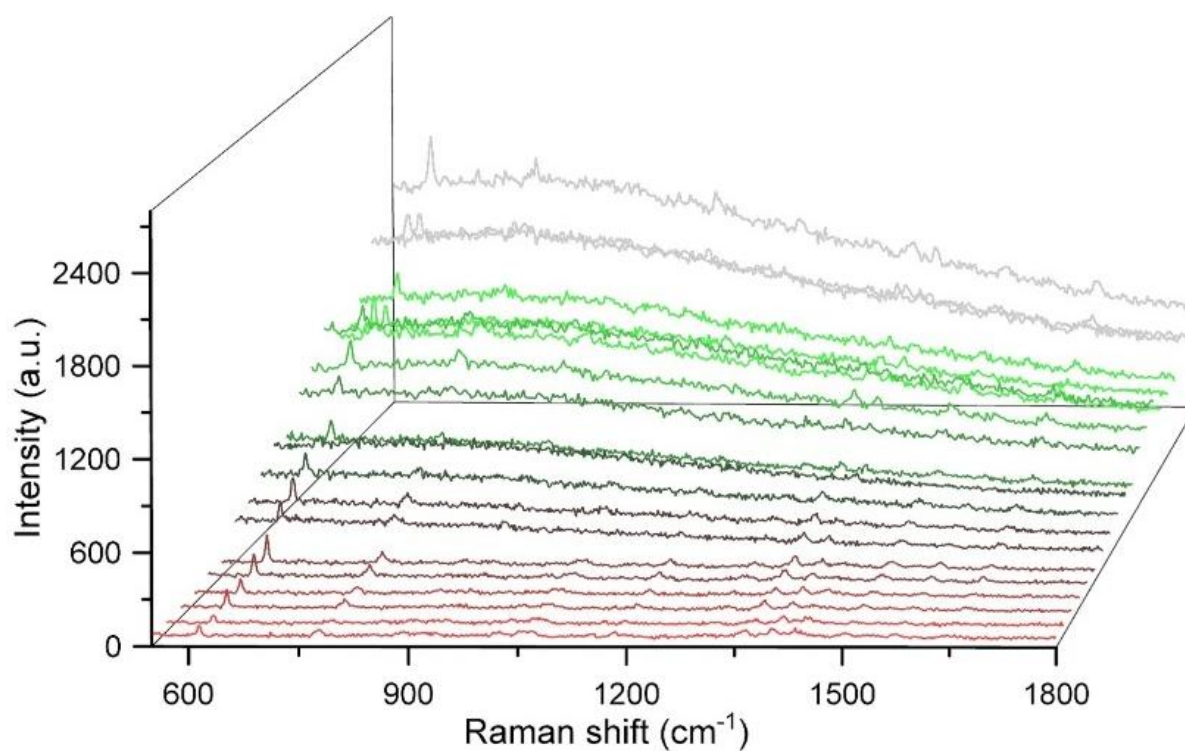

**Figure S15.** Raman spectra of mixed solution dried on the Si substrate:  $[R6G] = 1 \times 10^{-8} M$  &  $[Ni] = 1 \times 10^{-5} M$  ( $\lambda_{ex} = 532$  nm).

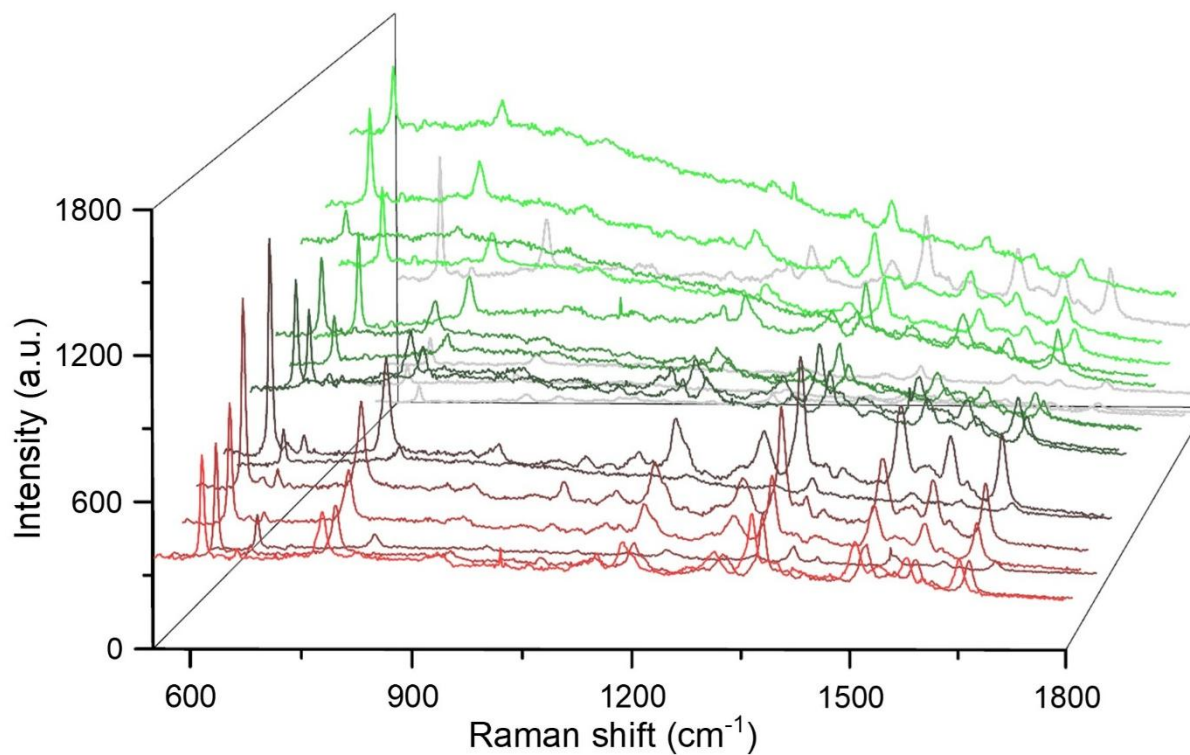

**Figure S16.** Raman spectrum in the PBS buffer dried on the Si substrate:  $10^{-6} M$  R6G molecule with  $5 \times 10^{-5} M$  [Ni] dried

from the solution of PBS : ACN (95% : 5%, volume/volume). All Raman spectra were recorded under excitation at 532 nm.

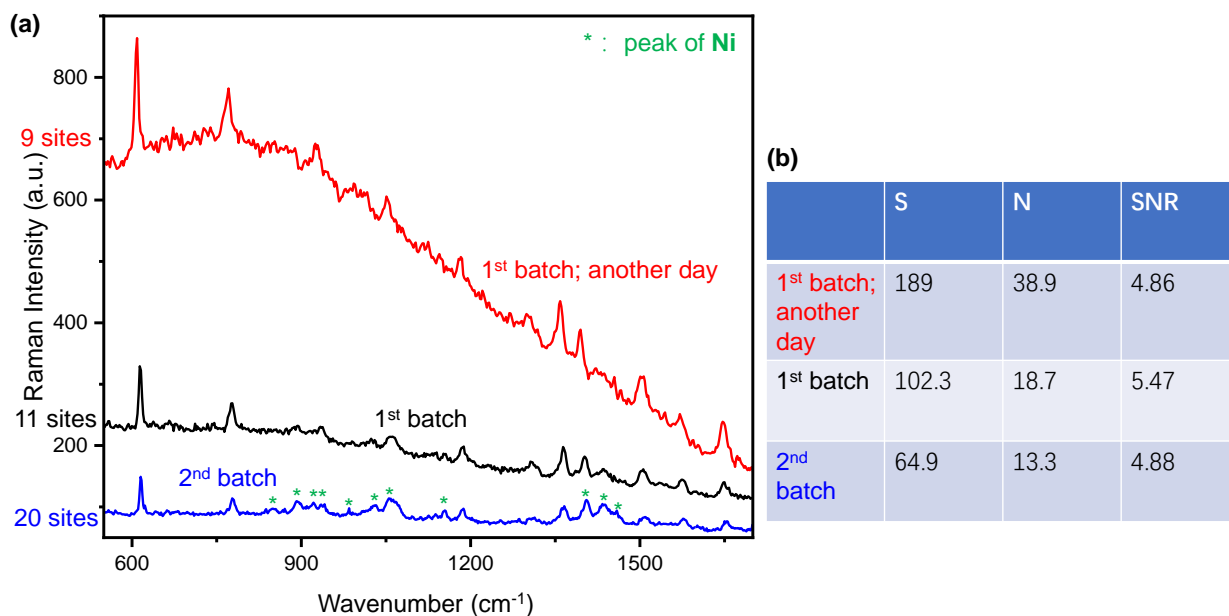

**Figure S17.** (a) Averaged Raman spectra of mixed solution dried on the Si substrate:  $[R6G] = 1 \times 10^{-8} \text{ M}$  &  $[Ni] = 1 \times 10^{-5} \text{ M}$  ( $\lambda_{ex} = 532 \text{ nm}$ ), measured from different batches and on different days. (b) Corresponding signal-to-noise ratio (SNR) value of the data shown in (a) at  $608 \text{ cm}^{-1}$ .

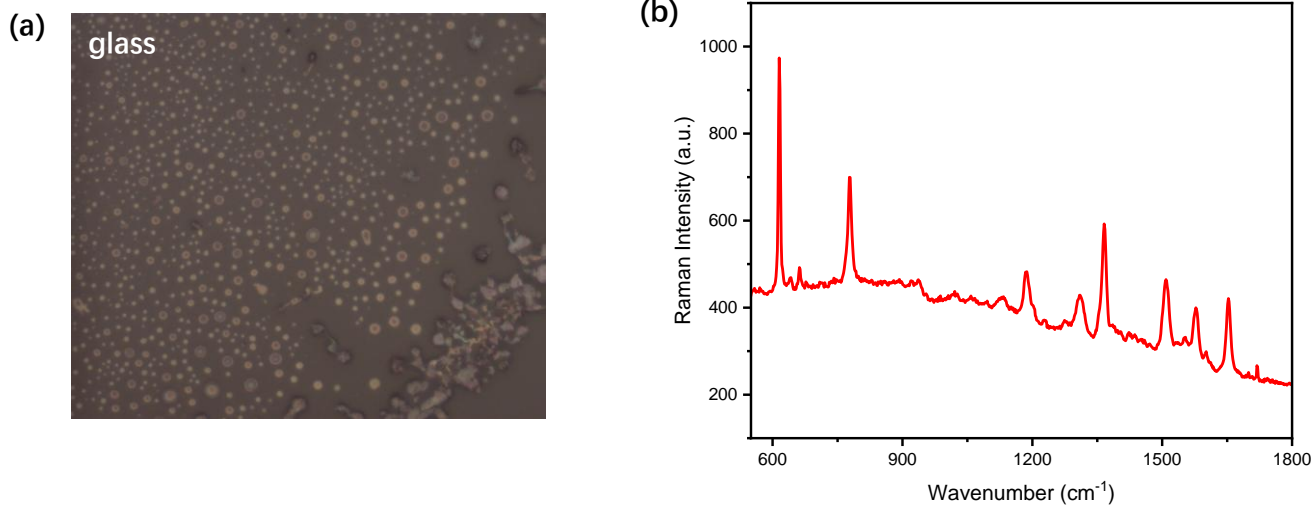

**Figure S18.** (a) Optical images of a glass substrate after drying from a mixed solution containing  $[R6G] = 1 \times 10^{-6}$  M and  $[Ni] = 5 \times 10^{-5}$  M. (b) Average Raman spectrum acquired from 20 sites on the glass substrate ( $\lambda_{ex} = 532$  nm).

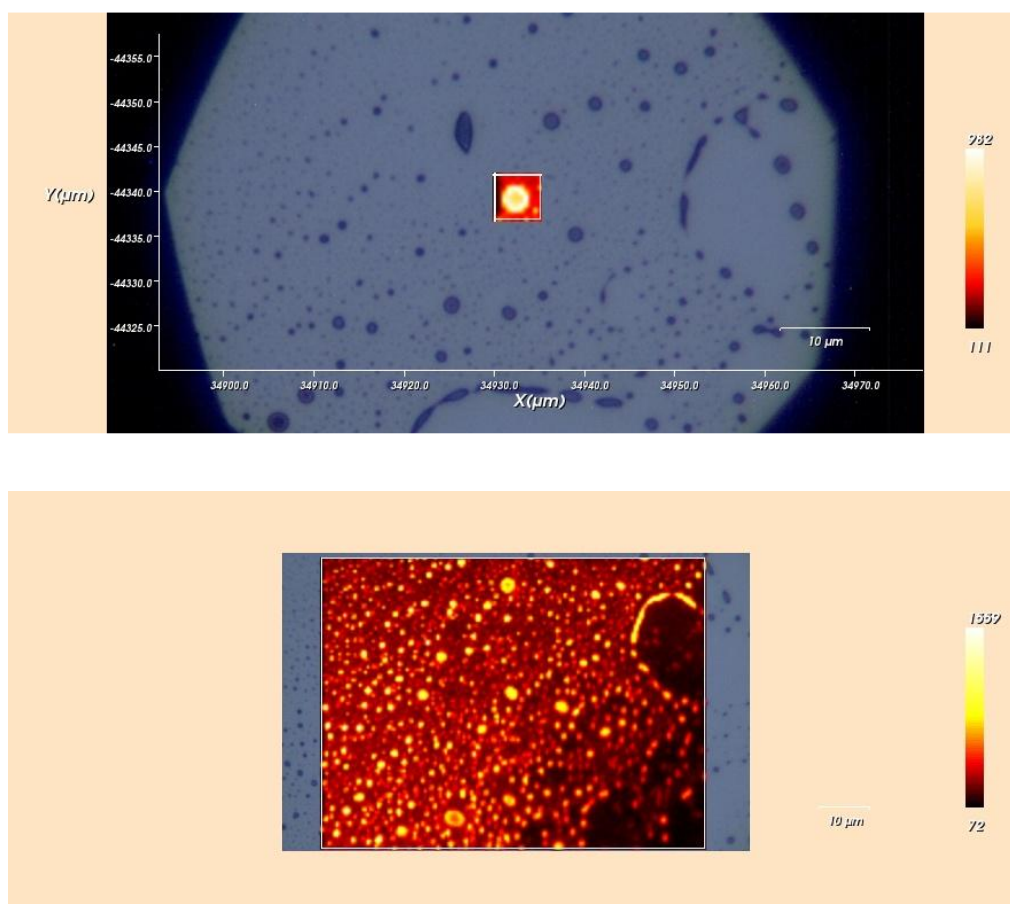

**Figure S19.** Raman mapping image at  $608 \text{ cm}^{-1}$  of the sample prepared from a solution containing  $1 \times 10^{-6}$  M **R6G** and  $1 \times 10^{-5}$  M **[Ni]** in acetonitrile, dried on a Si substrate. ( $\lambda_{ex} = 532$  nm)

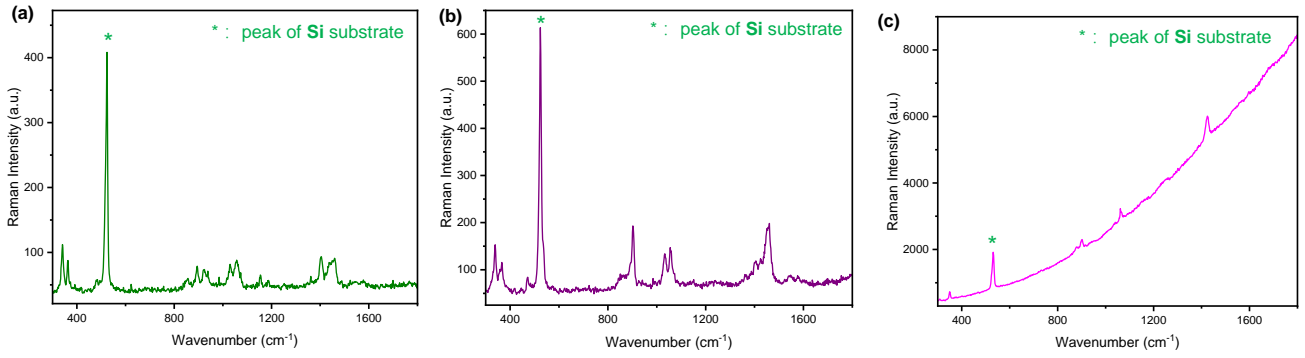

**Figure S20.** Raman spectra of (a) **[Ni]**, (b) **[Pd]**, and (c) **[Zn]** after drying from  $5 \times 10^{-5}$  M acetonitrile solutions on a Si substrate. ( $\lambda_{\text{ex}} = 532$  nm)

### 3. EF (Enhanced Factor)

The EF was calculated according to the following formula.<sup>1,2</sup>

$$EF = \frac{\left(\frac{I}{N}\right)}{\left(\frac{I_{\text{reference}}}{N_{\text{reference}}}\right)} \quad (1)$$

$$N \text{ or } N_{\text{reference}} = CVN_A \frac{A_{\text{Raman}}}{A_{\text{sub}}} \quad (2)$$

$$SD = \sqrt{\frac{\sum_{i=1}^n (x_i - \bar{x})^2}{n - 1}} \quad (3)$$

$$95\%CI = 1.96 \times \frac{SD}{\sqrt{n}} \quad (4)$$

Here,  $I$  and  $I_{\text{reference}}$  represent enhanced and normal Raman intensities, while  $N$  and  $N_{\text{reference}}$  denote the number of **R19/R6G** molecules contributing to these signals. For analyte molecules on Si/SiO<sub>2</sub> wafers,  $N$  and  $N_{\text{reference}}$  were estimated assuming uniform distribution, where  $C$  is molar concentration (molecular platform developed in this work:  $1 \times 10^{-6}$  M **R19/R6G** +  $5 \times 10^{-5}$  M **Ni/Pd**; reference:  $1 \times 10^{-3}$  M **R19/R6G**),  $V$  is droplet volume (5  $\mu\text{L}$ ),  $N_A$  is Avogadro's constant,  $A_{\text{Raman}}$  is laser spot area (44.2  $\mu\text{m}^2$ ), and  $A_{\text{sub}}$  is effective substrate area.  $SD$  and  $95\%CI$  represent sample standard deviation and 95% confidence interval (normal distribution).  $n$  is the sample size and  $\bar{x}$  represents the mean.

**Table S1.** EF of **R19/R6G**, accounting for CT effects.

| Probe Molecule | CT complex | Mean of EF | SD    | 95%CI |
|----------------|------------|------------|-------|-------|
| <b>R19</b>     | <b>Ni</b>  | 475.1      | 111.2 | 54.5  |
| <b>R19</b>     | <b>Pd</b>  | 130.5      | 54.3  | 29.5  |
| <b>R6g</b>     | <b>Ni</b>  | 860.8      | 346.8 | 152.0 |
| <b>R6g</b>     | <b>Pd</b>  | 336.8      | 78.7  | 41.2  |

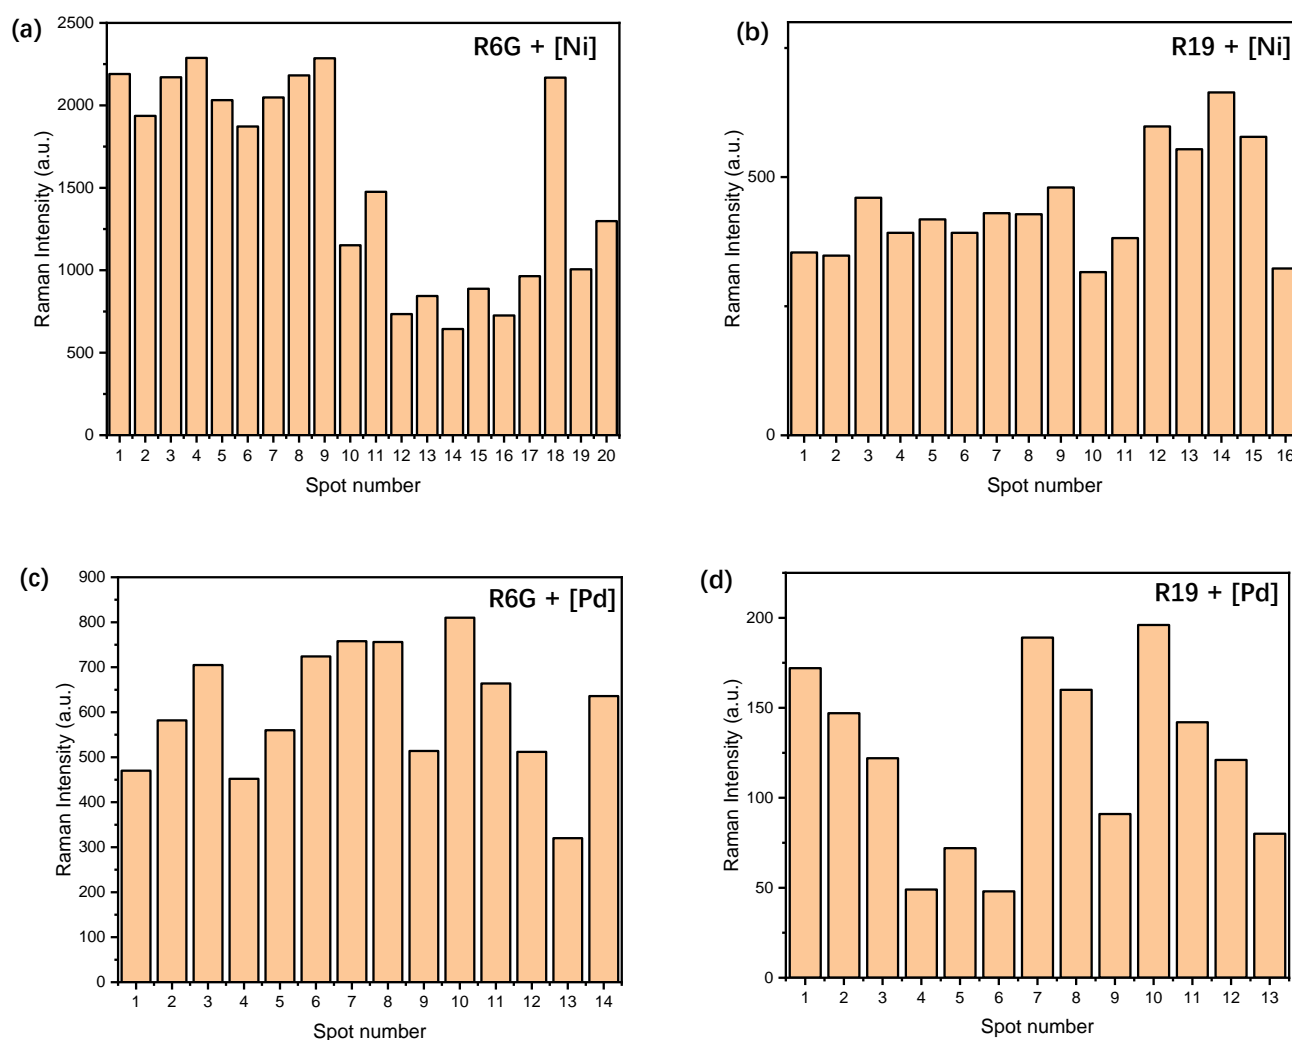**Figure S21.** Distribution plots of the Raman intensity for samples of (a) **[R6G] + [Ni]**, (b) **[R19] + [Ni]**, (c) **[R6G] + [Pd]**, (d) **[R19] + [Pd]**, under the condition of  $[R19/R6G] = 1 \times 10^{-6} \text{ M}$  &  $[Ni/Pd] = 5 \times 10^{-5} \text{ M}$  in acetonitrile, dried on a Si substrate. ( $\lambda_{\text{ex}} = 532 \text{ nm}$ ) The Raman intensities were extracted at  $608 \text{ cm}^{-1}$  based on the spectra shown in Figure S6-S7 and S10-S11.

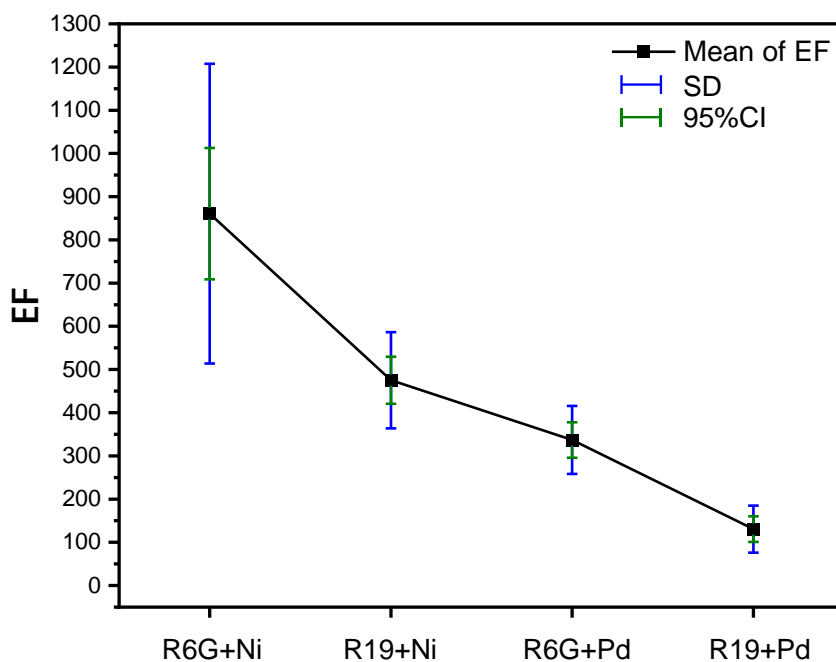

**Figure S22.** Enhancement factor (EF) values presented as mean  $\pm$  standard deviation (SD) with 95% confidence intervals (CI), calculated from the distribution plots in Figure S21.

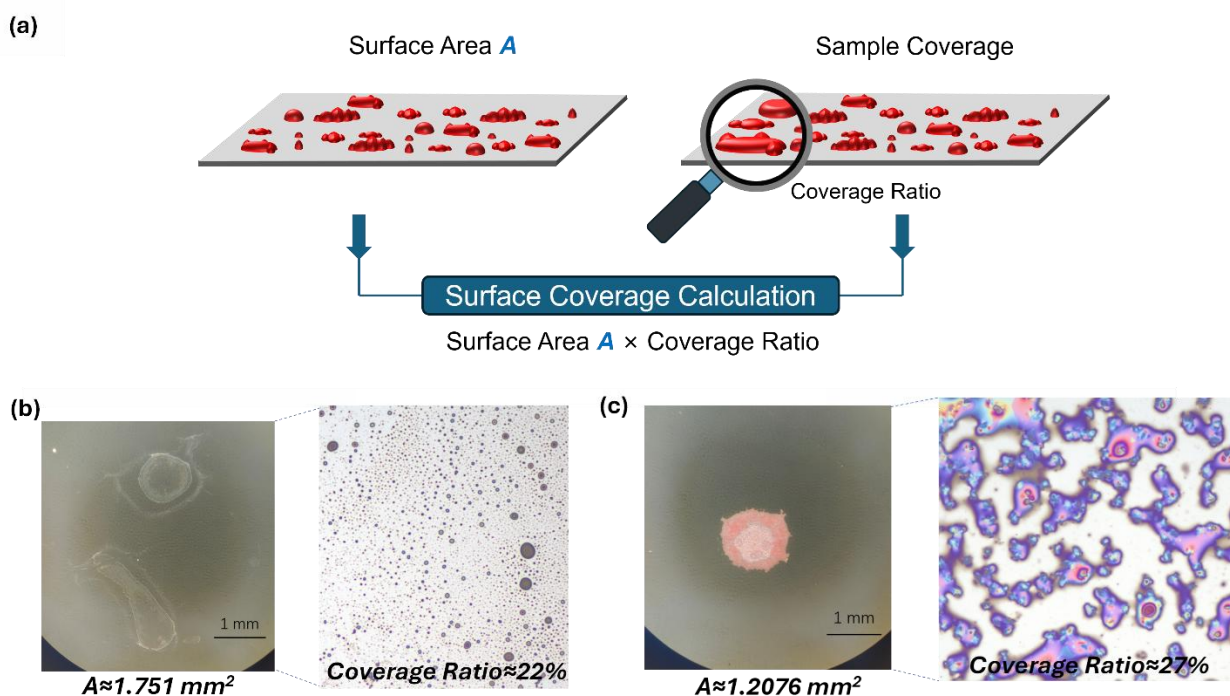

**Figure S23.** (a) An illustration scheme to calculate the surface coverage after drying. (b-c) Optical microscopy images showing surface coverage and coverage ratio of the dried residue from an acetonitrile solution containing (b)  $[\text{R6G}] = 1 \times 10^{-6} \text{ M}$  and  $[\text{Ni}] = 1 \times 10^{-5} \text{ M}$  on a Si substrate, and (c)  $[\text{R6G}] = 1 \text{ mM}$  on a Si substrate.

#### 4. Reflectance Spectra

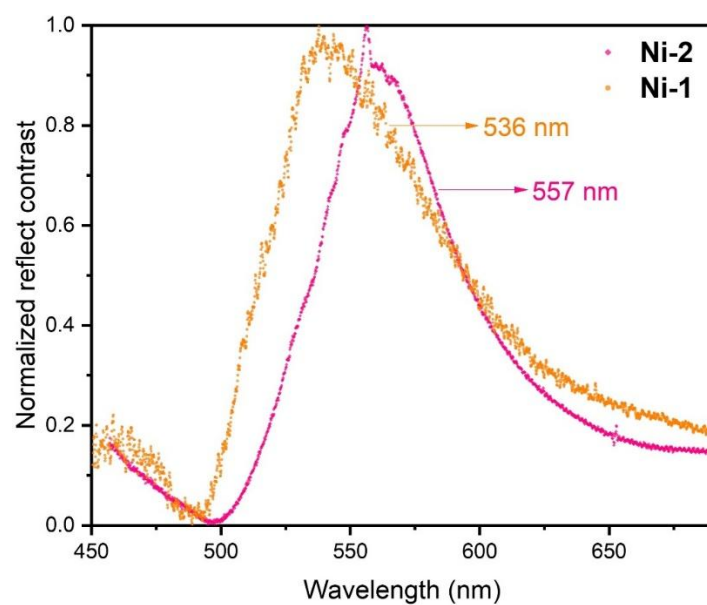

Figure S24. Reflectance spectra of Ni-1/2 single crystals

#### 5. UV-vis Spectra

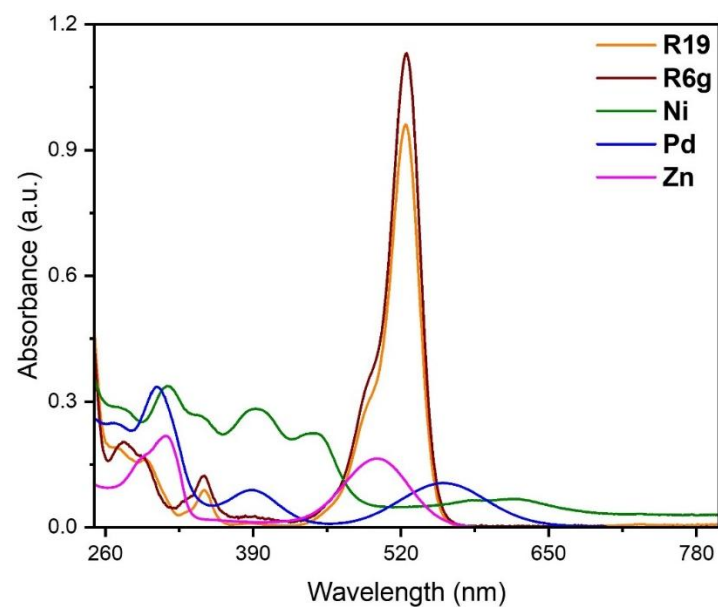

Figure S25. UV-vis spectra in acetonitrile at a concentration of  $1 \times 10^{-5}$  M.

#### 6. $^1\text{H-NMR}$ Spectra

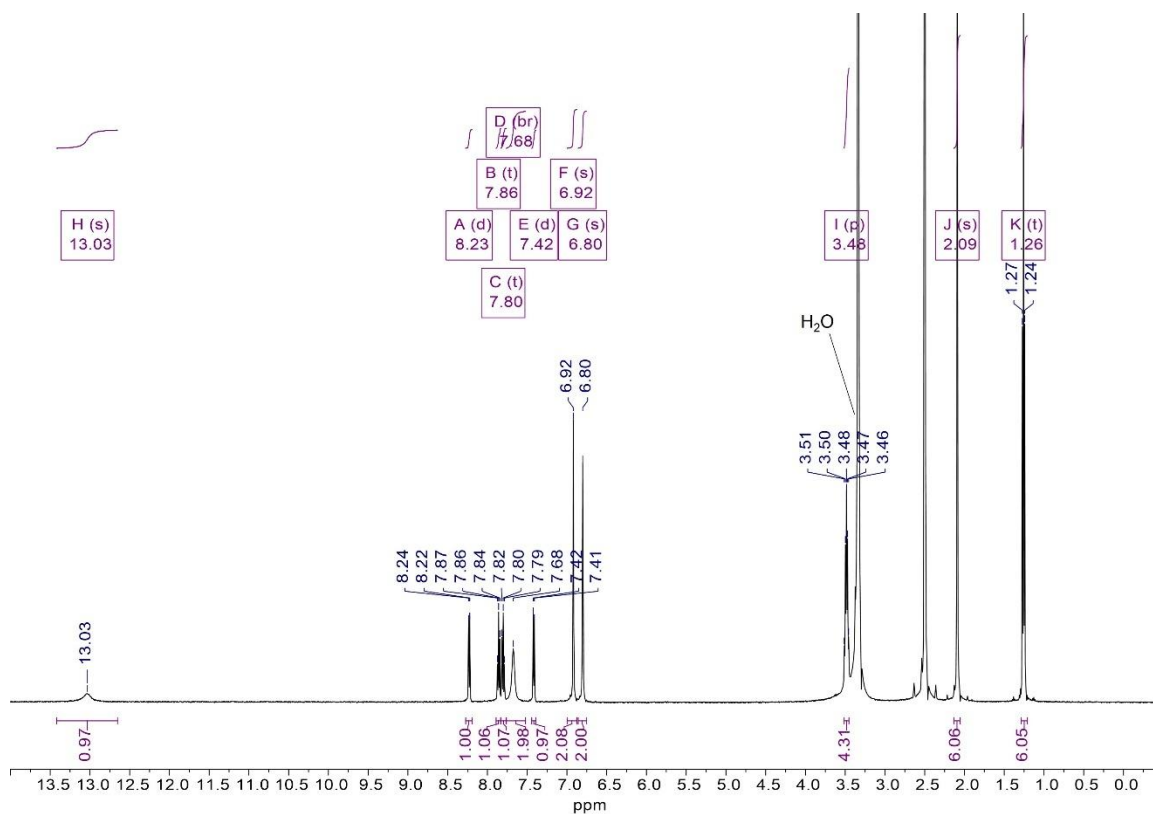

Figure S26. <sup>1</sup>H-NMR spectra of R19 in DMSO-*d*<sub>6</sub>.

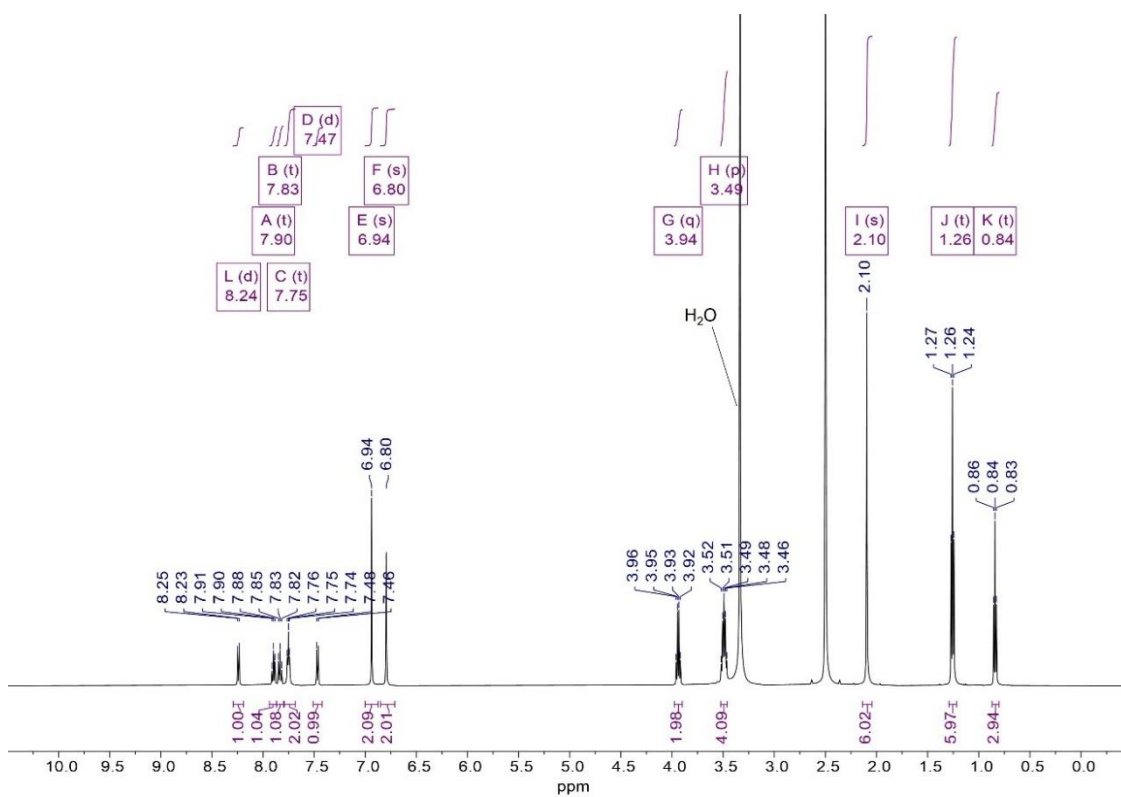

Figure S27. <sup>1</sup>H-NMR spectra of R6G in DMSO-*d*<sub>6</sub>.

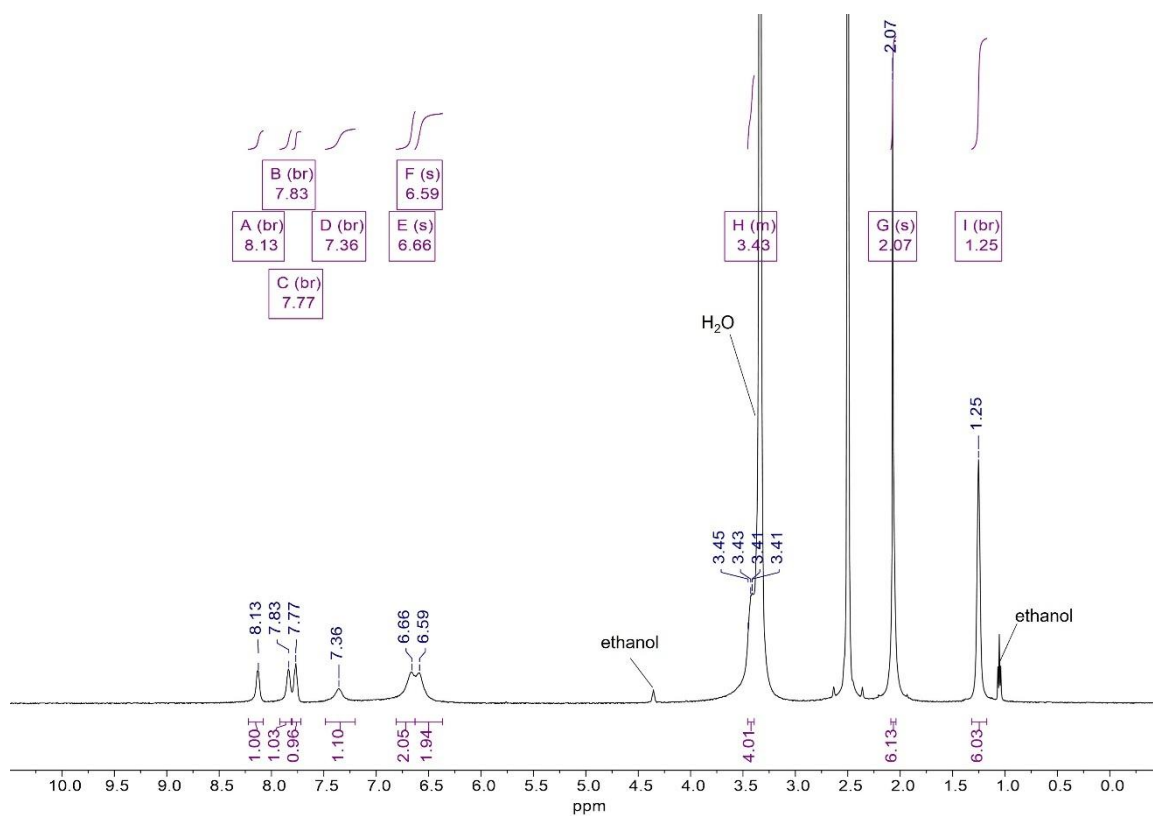

Figure S28.  $^1\text{H-NMR}$  spectra of Ni-1 in  $\text{DMSO-}d_6$ .

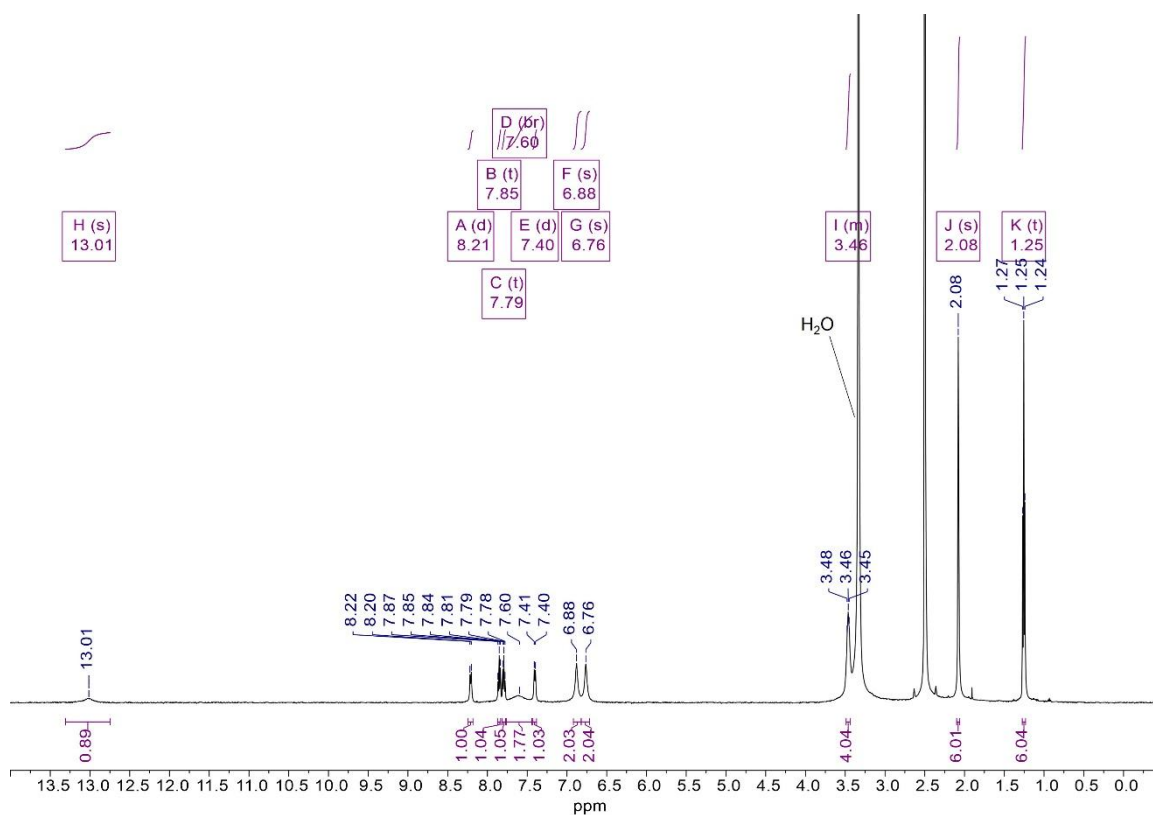

Figure S29.  $^1\text{H-NMR}$  spectra of Pd-1 in  $\text{DMSO-}d_6$ .

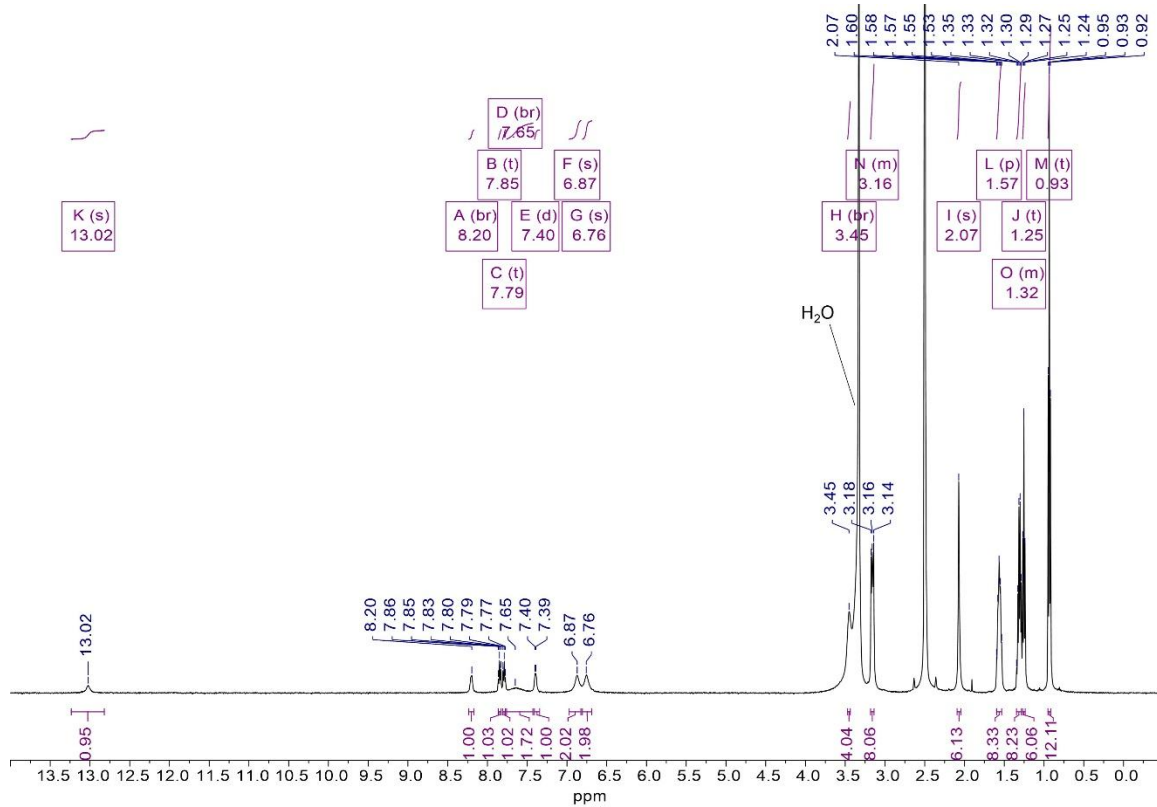

Figure S30.  $^1\text{H-NMR}$  spectra of Zn-1 in  $\text{DMSO-}d_6$ .

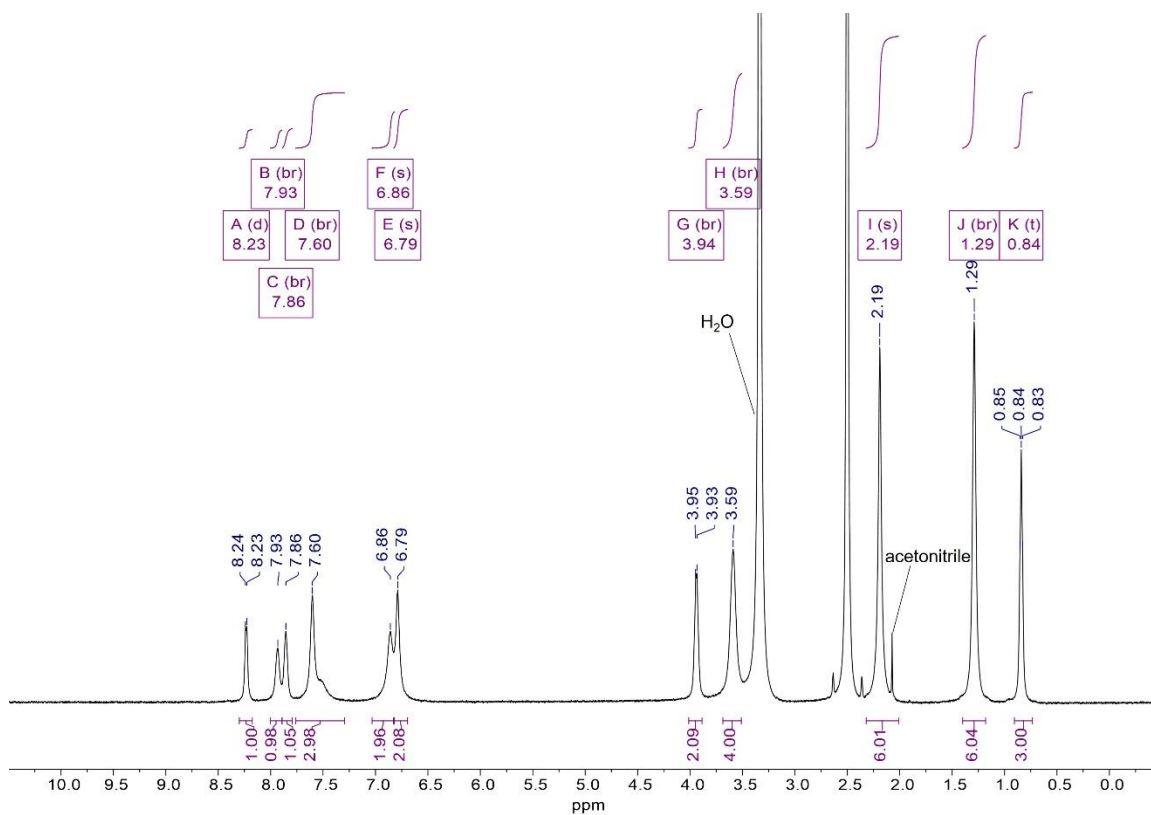

Figure S31.  $^1\text{H-NMR}$  spectra of Ni-2 in  $\text{DMSO-}d_6$ .

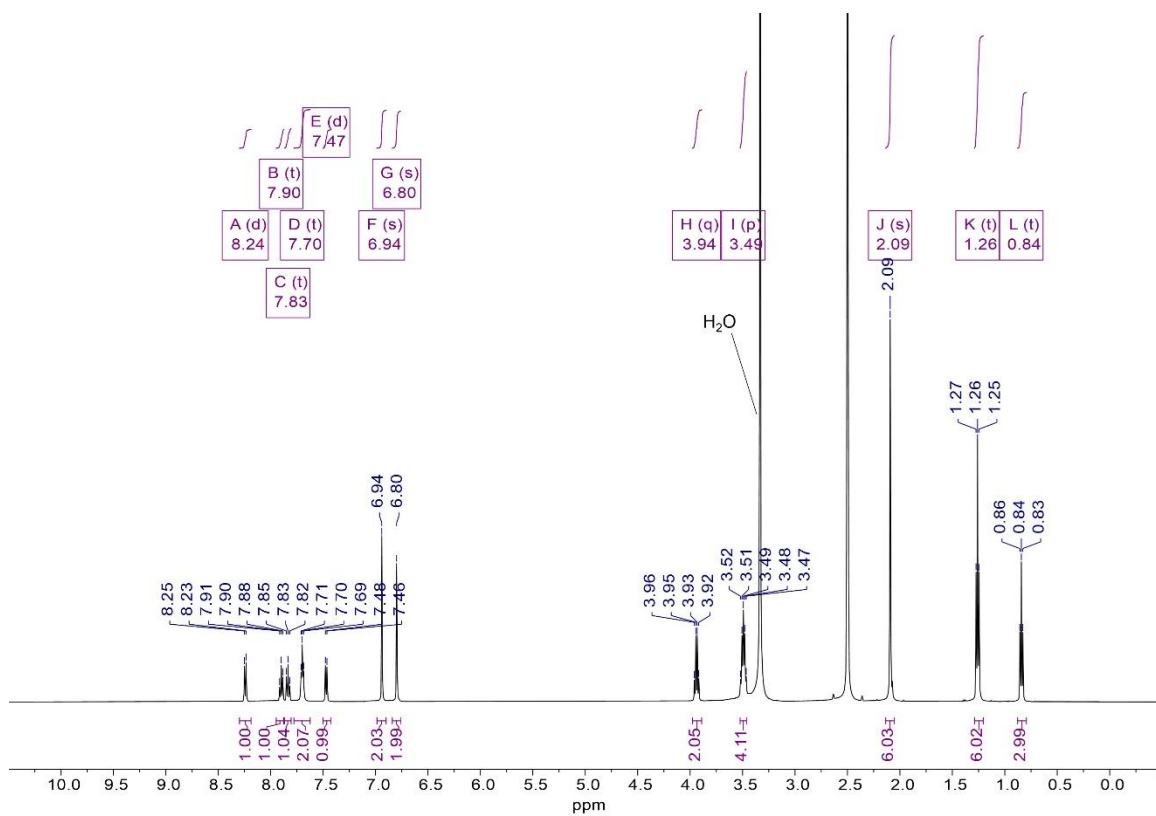

Figure S32. <sup>1</sup>H-NMR spectra of Pd-2 in DMSO-*d*<sub>6</sub>.

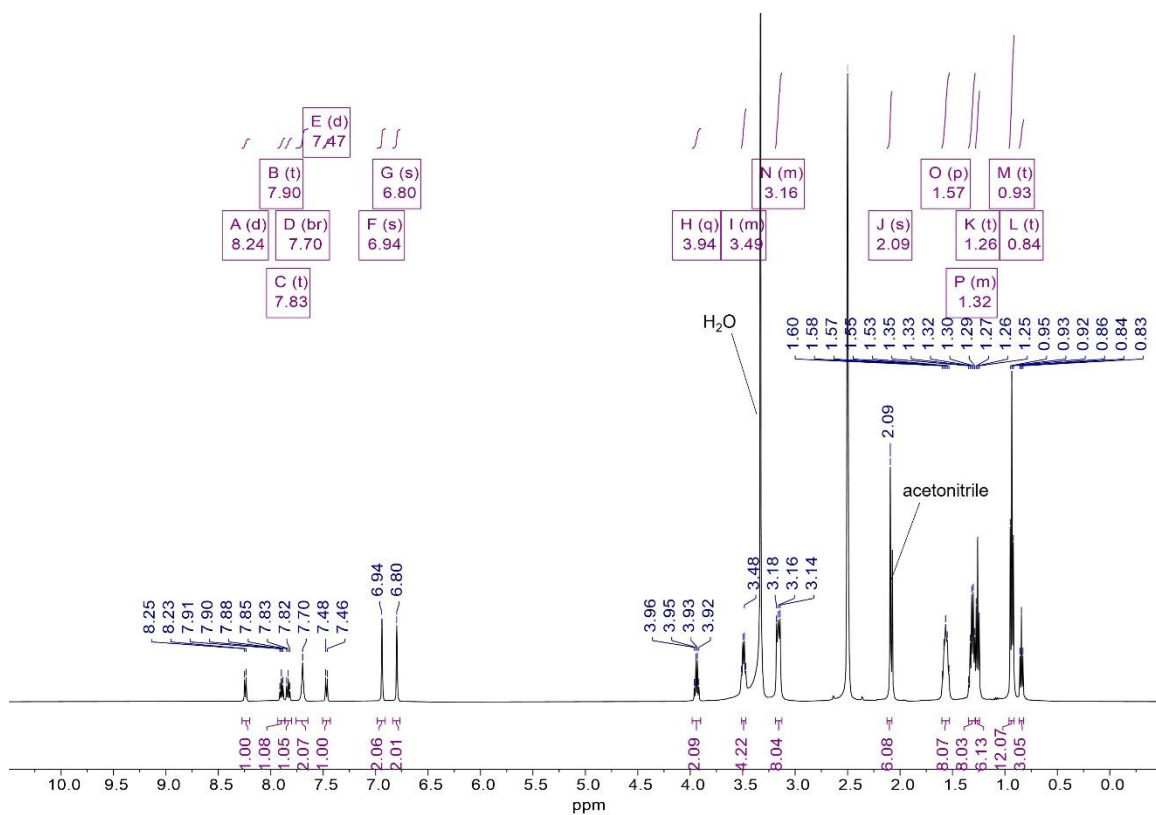

Figure S33. <sup>1</sup>H-NMR spectra of Zn-2 in DMSO-*d*<sub>6</sub>.

## 7. Refinement Data of the X-ray Structures

**Table S2.** Crystal data and structure refinements for **Ni-1** (CCDC: 2479924) and **Ni-2** (CCDC: 2479921).

|                                     | <b>Ni-1</b>                                                                     | <b>Ni-2</b>                                                                     |
|-------------------------------------|---------------------------------------------------------------------------------|---------------------------------------------------------------------------------|
| Empirical formula                   | C <sub>34</sub> H <sub>33</sub> N <sub>2</sub> NiO <sub>4</sub> S <sub>10</sub> | C <sub>34</sub> H <sub>31</sub> N <sub>2</sub> NiO <sub>3</sub> S <sub>10</sub> |
| Formula weight                      | 912.93                                                                          | 894.92                                                                          |
| Temperature / K                     | 296(2)                                                                          | 293(2)                                                                          |
| Crystal system                      | Triclinic                                                                       | Monoclinic                                                                      |
| Space group                         | P-SS1                                                                           | P2 <sub>1</sub> /c                                                              |
| a / Å                               | 11.480(5)                                                                       | 28.6433(12)                                                                     |
| b / Å                               | 13.227(5)                                                                       | 11.3115(5)                                                                      |
| c / Å                               | 14.218(5)                                                                       | 15.862(3)                                                                       |
| α / °                               | 101.118(12)                                                                     | 90                                                                              |
| β / °                               | 97.148(13)                                                                      | 105.4380(10)                                                                    |
| γ / °                               | 98.529(14)                                                                      | 90                                                                              |
| Volume / Å <sup>3</sup>             | 2068.8(13)                                                                      | 7856.6(6)                                                                       |
| Z                                   | 2                                                                               | 8                                                                               |
| ρ <sub>calc</sub> Mg/m <sup>3</sup> | 1.466                                                                           | 1.513                                                                           |
| μ/mm <sup>-1</sup>                  | 1.012                                                                           | 1.063                                                                           |
| F(000)                              | 942                                                                             | 3688                                                                            |
| Crystal size / mm <sup>3</sup>      | 0.3x0.2x0.2                                                                     | 0.4x0.3x0.2                                                                     |
| Radiation                           | MoKα (λ = 0.71073)                                                              | MoKα (λ = 0.71073)                                                              |

|                                                     |                                                                    |                                                                    |
|-----------------------------------------------------|--------------------------------------------------------------------|--------------------------------------------------------------------|
| 2 $\theta$ range for data collection/ $^{\circ}$    | 2.396 to 25.250                                                    | 2.196 to 27.935                                                    |
| Index ranges                                        | $-13 \leq h \leq 13$ , $-15 \leq k \leq 15$ , $-17 \leq l \leq 17$ | $-37 \leq h \leq 37$ , $-14 \leq k \leq 14$ , $-33 \leq l \leq 30$ |
| Reflections collected                               | 58888                                                              | 113379                                                             |
| Independent reflections                             | 7491 [ $R_{\text{int}} = 0.0590$ ]                                 | 18803 [ $R_{\text{int}} = 0.1122$ ]                                |
| Data/restraints/parameters                          | 7491/1/469                                                         | 118803/0/911                                                       |
| Goodness-of-fit on $F^2$                            | 1.040                                                              | 1.046                                                              |
| Final R indexes [ $R > 2\sigma(I)$ ]                | $R_1 = 0.0434$ , $wR_2 = 0.1096$                                   | $R_1 = 0.0843$ , $wR_2 = 0.1471$                                   |
| Final R indexes [all data]                          | $R_1 = 0.0575$ , $wR_2 = 0.1179$                                   | $R_1 = 0.1565$ , $wR_2 = 0.1738$                                   |
| Largest diff. peak/hole / $\text{e}\text{\AA}^{-3}$ | 0.600/−0.397                                                       | 1.583 / −0.930                                                     |

**Table S3.** Crystal data and structure refinements for **Pd-1** (CCDC: 2479919) and **Pd-2** (CCDC: 2479923).

|                     | <b>Pd-1</b>                                                     | <b>Pd-2</b>                                                     |
|---------------------|-----------------------------------------------------------------|-----------------------------------------------------------------|
| Empirical formula   | $\text{C}_{62}\text{H}_{60}\text{N}_6\text{O}_6\text{PdS}_{10}$ | $\text{C}_{62}\text{H}_{58}\text{N}_4\text{O}_6\text{PdS}_{10}$ |
| Formula weight      | 1412.16                                                         | 1382.12                                                         |
| Temperature / K     | 304(2)                                                          | 296(2)                                                          |
| Crystal system      | Triclinic                                                       | Triclinic                                                       |
| Space group         | P-1                                                             | P-1                                                             |
| $a / \text{\AA}$    | 8.0052(2)                                                       | 11.5454(17)                                                     |
| $b / \text{\AA}$    | 12.2415(3)                                                      | 12.1683(19)                                                     |
| $c / \text{\AA}$    | 17.1514(5)                                                      | 12.7456(19)                                                     |
| $\alpha / ^{\circ}$ | 97.2910(10)                                                     | 85.850(5)                                                       |
| $\beta / ^{\circ}$  | 103.4270(10)                                                    | 64.210(5)                                                       |
| $\gamma / ^{\circ}$ | 90.2760(10)                                                     | 88.366(5)                                                       |

|                                            |                                                                        |                                                                        |
|--------------------------------------------|------------------------------------------------------------------------|------------------------------------------------------------------------|
| Volume / Å <sup>3</sup>                    | 1620.58(7)                                                             | 1608.0(4)                                                              |
| Z                                          | 1                                                                      | 1                                                                      |
| $\rho_{\text{calc}}$ Mg/m <sup>3</sup>     | 1.447                                                                  | 1.427                                                                  |
| $\mu/\text{mm}^{-1}$                       | 0.663                                                                  | 0.666                                                                  |
| F(000)                                     | 728                                                                    | 712                                                                    |
| Crystal size / mm <sup>3</sup>             | 0.4x0.3x0.2                                                            | 0.5x0.4x0.3                                                            |
| Radiation                                  | MoK $\alpha$ ( $\lambda$ = 0.71073)                                    | MoK $\alpha$ ( $\lambda$ = 0.71073)                                    |
| 2 $\theta$ range for data collection/°     | 2.463 to 28.018                                                        | 2.363 to 27.956                                                        |
| Index ranges                               | -10 $\leq$ h $\leq$ 10, -16 $\leq$ k $\leq$ 16, -22 $\leq$ l $\leq$ 22 | -15 $\leq$ h $\leq$ 15, -16 $\leq$ k $\leq$ 16, -16 $\leq$ l $\leq$ 16 |
| Reflections collected                      | 47446                                                                  | 51298                                                                  |
| Independent reflections                    | 7793 [R <sub>int</sub> = 0.0351]                                       | 7679 [R(int) = 0.0581]                                                 |
| Data/restraints/parameters                 | 7793/0/417                                                             | 7679/23/404                                                            |
| Goodness-of-fit on F <sup>2</sup>          | 1.042                                                                  | 1.033                                                                  |
| Final R indexes [R $\geq$ 2 $\sigma$ (I)]  | R1 = 0.0327, wR2 = 0.0892                                              | R1 = 0.0440, wR2 = 0.1183                                              |
| Final R indexes [all data]                 | R1 = 0.0396, wR2 = 0.0964                                              | R1 = 0.0595, wR2 = 0.1306                                              |
| Largest diff. peak/hole / eÅ <sup>-3</sup> | 0.375/-0.364                                                           | 0.539 / -0.480                                                         |

**Table S4.** Crystal data and structure refinements for **Zn-1** (CCDC: 2479926) and **Zn-2** (CCDC: 2479925).

|                   | <b>Zn-1</b>                                                                            | <b>Zn-2</b>                                                                         |
|-------------------|----------------------------------------------------------------------------------------|-------------------------------------------------------------------------------------|
| Empirical formula | C <sub>48.25</sub> H <sub>65</sub> N <sub>3</sub> O <sub>3.50</sub> S <sub>10</sub> Zn | C <sub>51</sub> H <sub>69.25</sub> N <sub>3</sub> O <sub>3</sub> S <sub>10</sub> Zn |
| Formula weight    | 1129.00                                                                                | 1158.31                                                                             |
| Temperature / K   | 297(2)                                                                                 | 296(2)                                                                              |

|                                           |                                                                        |                                                                        |
|-------------------------------------------|------------------------------------------------------------------------|------------------------------------------------------------------------|
| Crystal system                            | Triclinic                                                              | Triclinic                                                              |
| Space group                               | P-1                                                                    | P-1                                                                    |
| a / Å                                     | 11.5628(16)                                                            | 13.410(3)                                                              |
| b / Å                                     | 13.435(2)                                                              | 13.585(3)                                                              |
| c / Å                                     | 19.579(3)                                                              | 19.962(4)                                                              |
| $\alpha$ / °                              | 96.172(5)                                                              | 97.868(7)                                                              |
| $\beta$ / °                               | 98.566(5)                                                              | 101.818(7)                                                             |
| $\gamma$ / °                              | 90.161(5)                                                              | 118.010(7)                                                             |
| Volume / Å <sup>3</sup>                   | 2989.7(8)                                                              | 3026.1(11)                                                             |
| Z                                         | 2                                                                      | 2                                                                      |
| $\rho_{\text{calc}}$ Mg/m <sup>3</sup>    | 1.254                                                                  | 1.271                                                                  |
| $\mu$ /mm <sup>-1</sup>                   | 0.799                                                                  | 0.791                                                                  |
| F(000)                                    | 1187                                                                   | 1220                                                                   |
| Crystal size / mm <sup>3</sup>            | 0.4x0.3x0.2                                                            | 0.5x0.4x0.3                                                            |
| Radiation                                 | MoK $\alpha$ ( $\lambda$ = 0.71073)                                    | MoK $\alpha$ ( $\lambda$ = 0.71073)                                    |
| 2 $\theta$ range for data collection/°    | 1.949 to 28.419                                                        | 2.305 to 27.990                                                        |
| Index ranges                              | -15 $\leq$ h $\leq$ 15, -17 $\leq$ k $\leq$ 17, -26 $\leq$ l $\leq$ 26 | -17 $\leq$ h $\leq$ 17, -17 $\leq$ k $\leq$ 17, -26 $\leq$ l $\leq$ 26 |
| Reflections collected                     | 56093                                                                  | 139592                                                                 |
| Independent reflections                   | 14851 [R <sub>int</sub> = 0.0968]                                      | 14536 [R(int) = 0.0482]                                                |
| Data/restraints/parameters                | 14851/66/652                                                           | 14536/27/661                                                           |
| Goodness-of-fit on F <sup>2</sup>         | 1.032                                                                  | 1.091                                                                  |
| Final R indexes [R $\geq$ 2 $\sigma$ (I)] | R1 = 0.0810, wR2 = 0.2269                                              | R1 = 0.0513, wR2 = 0.1498                                              |

|                                            |                           |                           |
|--------------------------------------------|---------------------------|---------------------------|
| Final R indexes [all data]                 | R1 = 0.1649, wR2 = 0.2898 | R1 = 0.0631, wR2 = 0.1589 |
| Largest diff. peak/hole / eÅ <sup>-3</sup> | 0.905/-0.621              | 0.985 / -0.420            |

### 8. IV Curves and Conductivities of M-1/2

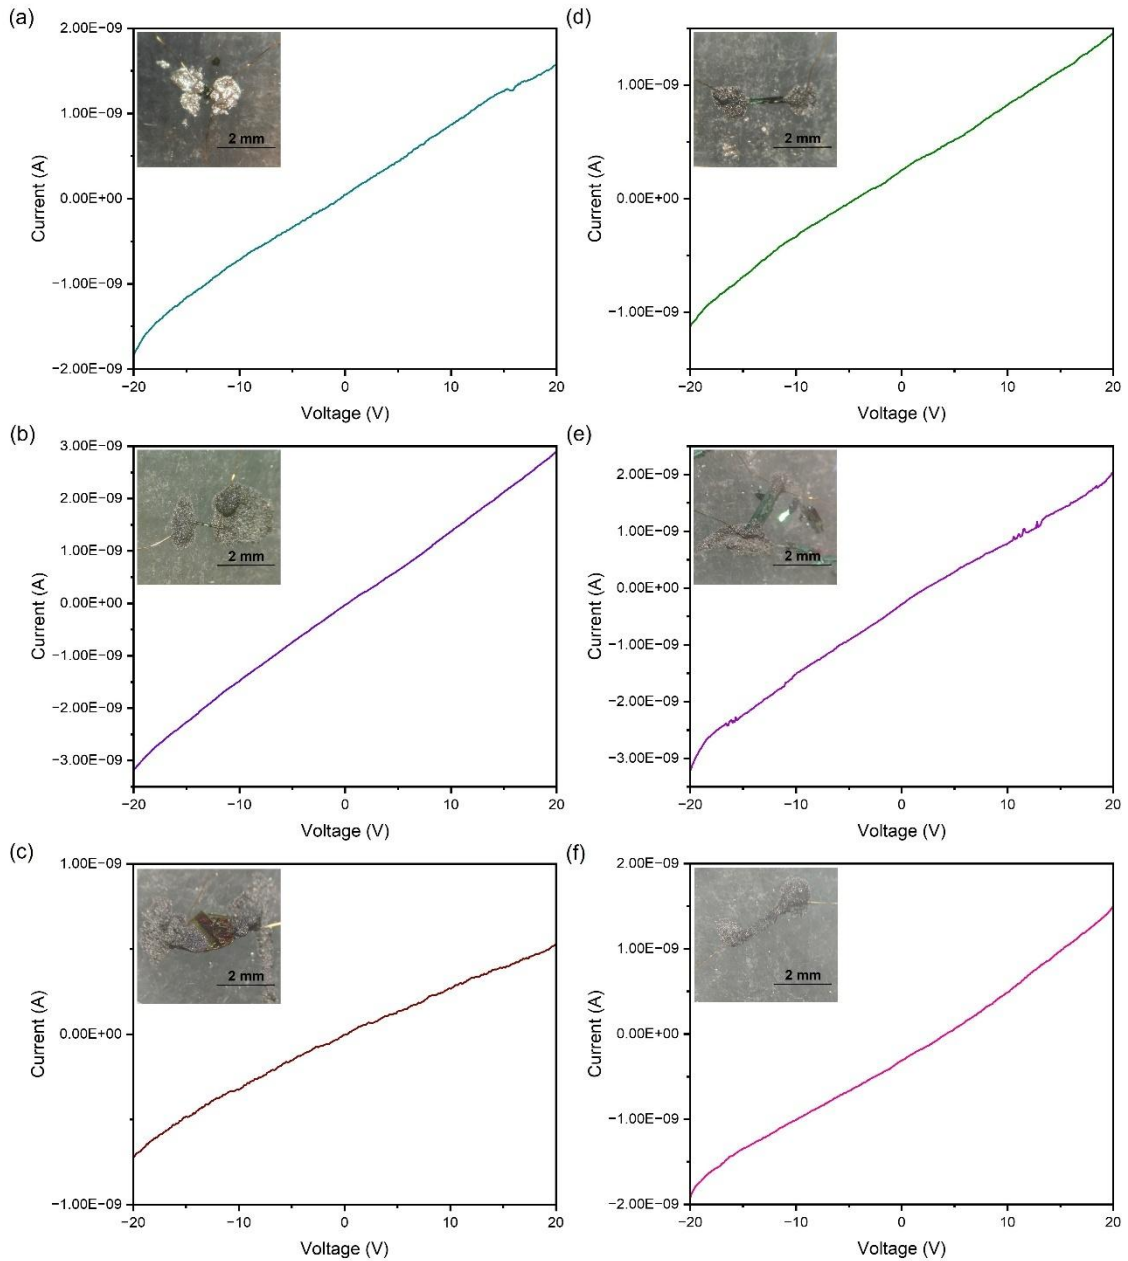

**Figure S34.** IV curves of M-1/2. Insets are corresponding fabricated devices. (a) Ni-1, (b) Pd-1, (c) Zn-1, (d) Ni-2, (e) Pd-2, (f) Zn-2.

Conductivity was calculated according to Equation (3):

$$\sigma = \frac{1}{R} \frac{L}{A} \quad (3)$$

where R, L and A are resistance, length and area respectively.

**Table S5.** Conductivity of **M-1/2**.

| Single crystal | Conductivity(S/m)    |
|----------------|----------------------|
| <b>Ni-1</b>    | $2.6 \times 10^{-7}$ |
| <b>Pd-1</b>    | $9.3 \times 10^{-6}$ |
| <b>Zn-1</b>    | $1.5 \times 10^{-7}$ |
| <b>Ni-2</b>    | $1.2 \times 10^{-6}$ |
| <b>Pd-2</b>    | $1.5 \times 10^{-6}$ |
| <b>Zn-2</b>    | $7.8 \times 10^{-7}$ |

## 9. Computational details

The structures of **Ni-1**, **Ni-2**, **Pd-2**, and **Zn-2** were directly extracted from their respective crystal structures for calculations. The monomeric rhodamine 19 and rhodamine 6G molecules were extracted from the crystal structures of **Ni-1** and **Ni-2**, respectively.

Unless otherwise specified, all density functional theory (DFT) and time-dependent DFT (TDDFT) calculations were performed using Gaussian 16, Revision C.02,<sup>3</sup> with the hybrid functional B3LYP<sup>4</sup> and D3 version of Grimme's dispersion with Becke-Johnson damping.<sup>5,6</sup> For light elements (C, H, N, O, S, Ni, and Zn), the 6-31G\* basis set<sup>7,8</sup> was employed. For Pd, scalar relativistic effects were treated using the Stuttgart/Dresden (SDD)<sup>9,10</sup> relativistic effective core potential together with its corresponding valence basis set. All calculations were performed in ACN solvent, modeled using the polarizable continuum model (PCM)<sup>11</sup> with Gaussian 16's default parameters for ACN (dielectric constant  $\epsilon = 35.688$ ).

The calculated absorption spectra and charge-density difference maps for charge-transfer transitions were generated using Multiwfn 3.8(dev)<sup>12-14</sup> based on TDDFT calculation results. Gaussian broadening with the full width at half maximum (FWHM) of 0.2 eV was applied to the absorption spectra. The density of states (DOS) was generated using Multiwfn by applying Gaussian function broadening to the energies of molecular orbitals (MOs) obtained from DFT calculations, with the FWHM of 0.5 eV. The maps of charge-density difference and MOs were generated using VMD

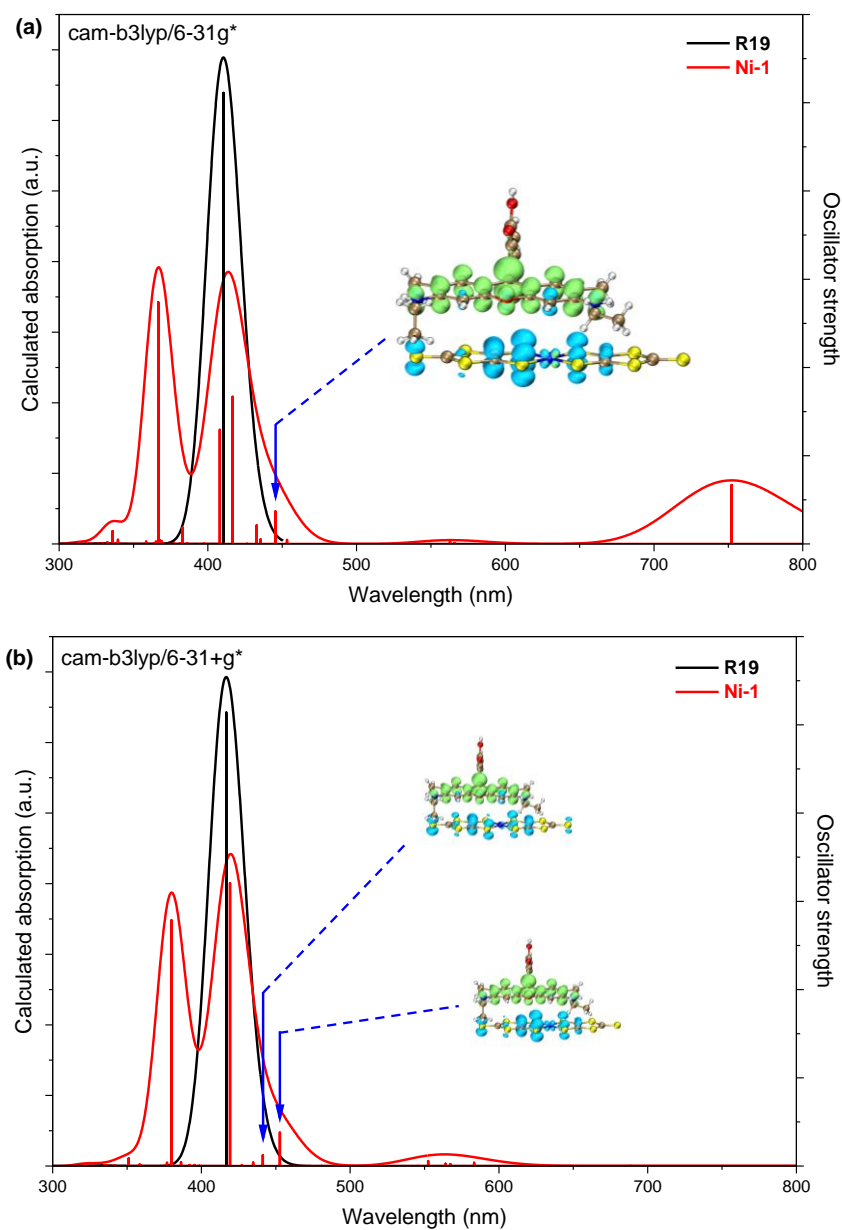

**Figure S35.** Calculated absorption spectra of **R19** and **Ni-1** (**R19+Ni**) at the level of (a) cam-b3lyp/6-31g\* and (b) cam-b3lyp/6-31+g\*. Inset pictures show charge-transfer transition (isosurface = 0.002 a.u.), with electrons transferring from the blue region to the green region.

## References

- 1 M. Yilmaz, E. Babur, M. Ozdemir, R. L. Giesecking, Y. Dede, U. Tamer, G. C. Schatz, A. Facchetti, H. Usta and G. Demirel, *Nature Mater*, 2017, **16**, 918–924.
- 2 Z. Zheng, S. Cong, W. Gong, J. Xuan, G. Li, W. Lu, F. Geng and Z. Zhao, *Nat Commun*, 2017, **8**, 1993.
- 3 Gaussian 16, Revision C.01, M. J. Frisch, G. W. Trucks, H. B. Schlegel, G. E. Scuseria, M. A. Robb, J. R. Cheeseman, G. Scalmani, V. Barone, G. A. Petersson, H. Nakatsuji et.al. Gaussian, Inc., Wallingford CT, 2016.
- 4 P. J. Stephens, F. J. Devlin, C. F. Chabalowski and M. J. Frisch, *J. Phys. Chem.*, 1994, **98**, 11623–11627.
- 5 S. Grimme, J. Antony, S. Ehrlich and H. Krieg, *The Journal of Chemical Physics*, 2010, **132**, 154104.
- 6 S. Grimme, S. Ehrlich and L. Goerigk, *J Comput Chem*, 2011, **32**, 1456–1465.
- 7 W. J. Hehre, R. Ditchfield and J. A. Pople, *The Journal of Chemical Physics*, 1972, **56**, 2257–2261.
- 8 P. C. Hariharan and J. A. Pople, *Theoret. Chim. Acta*, 1973, **28**, 213–222.
- 9 G. Igel-Mann, H. Stoll and H. Preuss, *Molecular Physics*, 1988, **65**, 1321–1328.
- 10 D. Andrae, U. Häußermann, M. Dolg, H. Stoll and H. Preuss, *Theoret. Chim. Acta*, 1990, **77**, 123–141.
- 11 G. Scalmani and M. J. Frisch, *The Journal of Chemical Physics*, 2010, **132**, 114110.
- 12 T. Lu and F. Chen, *J Comput Chem*, 2012, **33**, 580–592.
- 13 T. Lu, *The Journal of Chemical Physics*, 2024, **161**, 082503.
- 14 Z. Liu, T. Lu and Q. Chen, *Carbon*, 2020, **165**, 461–467.
- 15 W. Humphrey, A. Dalke and K. Schulten, *Journal of Molecular Graphics*, 1996, **14**, 33–38.
